1  
2  
3  
4  
5  
6  
7  
8  
9  
10  
11  
12  
13  
14  
15  
16  
17  
18  
19  
20  
21  
22  
23  
24  
25  
26  
27  
28  
29  
30  
31  
32

# TopoRoot: A method for computing hierarchy and fine-grained traits of maize roots from X-ray CT images

Dan Zeng<sup>1\*</sup>, Mao Li<sup>2</sup>, Ni Jiang<sup>2</sup>, Yiwen Ju<sup>1</sup>, Hannah Schreiber<sup>3</sup>, Erin Chambers<sup>3</sup>, David Letscher<sup>3</sup>, Tao Ju<sup>1</sup>, Christopher N. Topp<sup>2</sup>

1: Department of Computer Science and Engineering, Washington University in St. Louis, Saint Louis, Missouri, 63130, USA

2: Donald Danforth Plant Science Center, Saint Louis, Missouri, 63132, USA

3: Department of Computer Science, Saint Louis University, Saint Louis, Missouri, 63103, USA

\*author to whom correspondence should be addressed: [danzeng@wustl.edu](mailto:danzeng@wustl.edu)

## 33 Abstract

### 34 Background:

35 3D imaging, such as X-ray CT and MRI, has been widely deployed to study plant root structures.  
36 Many computational tools exist to extract coarse-grained features from 3D root images, such as  
37 total volume, root number and total root length. However, methods that can accurately and  
38 efficiently compute fine-grained root traits, such as root number and geometry at each hierarchy  
39 level, are still lacking. These traits would allow biologists to gain deeper insights into the root  
40 system architecture (RSA).

### 41 Results:

42 We present TopoRoot, a high-throughput computational method that computes fine-grained  
43 architectural traits from 3D X-ray CT images of field-excavated maize root crowns. These traits  
44 include the number, length, thickness, angle, tortuosity, and number of children for the roots at  
45 each level of the hierarchy. TopoRoot combines state-of-the-art algorithms in computer graphics,  
46 such as topological simplification and geometric skeletonization, with customized heuristics for  
47 robustly obtaining the branching structure and hierarchical information. TopoRoot is validated  
48 on both real and simulated root images, and in both cases it was shown to improve the accuracy  
49 of traits over existing methods. We also demonstrate TopoRoot in differentiating a maize root  
50 mutant from its wild type segregant using fine-grained traits. TopoRoot runs within a few  
51 minutes on a desktop workstation for volumes at the resolution range of  $400^3$ , without need for  
52 human intervention.

### 53 Conclusions:

54 TopoRoot improves the state-of-the-art methods in obtaining more accurate and comprehensive  
55 fine-grained traits of maize roots from 3D CT images. The automation and efficiency makes

56 TopoRoot suitable for batch processing on a large number of root images. Our method is thus  
57 useful for phenomic studies aimed at finding the genetic basis behind root system architecture  
58 and the subsequent development of more productive crops.

## 59 Keywords

60 Root system architecture, Phenotyping, 3D Imaging, Topology, Computer Graphics

## 61 Introduction

62 Roots are the primary means by which the plant absorbs water and nutrients, and they provide  
63 anchorage to the plant. These functions are largely determined by the root system architecture  
64 (RSA) [10, 2, 8], which describes both the geometry of individual roots and their hierarchical  
65 relationships. Quantifying RSA enables efforts to discover the genetic control of root traits,  
66 which can lead to improved crop productivity while minimizing adverse environmental effects  
67 [8]. However, RSA is difficult to study owing to roots' poor accessibility as the "hidden" half of  
68 the plant. Traditionally, roots are excavated from the soil, washed, and then measured by hand  
69 using devices such as rulers, calipers, and protractors. This process is not only labor-intensive  
70 but also prone to human errors. More importantly, many aspects of RSA, particularly those  
71 pertaining to lateral roots of higher order, are almost impossible to measure by hand.

72

73 Advances in 3D imaging, including X-ray CT, MRI, and optical imaging [20, 27, 15], have  
74 allowed root shapes to be captured digitally either after excavation or *in situ*. The availability of  
75 such imaging data has paved the way for recent efforts towards computational quantification of  
76 root system architecture [23, 19, 28]. However, most image-based root phenotyping methods  
77 only compute overall traits such as the volume, depth, convex hull volume, total root length, and

78 root number [33, 6, 14, 5]. Though useful, these traits which are aggregated over the whole root  
79 system do not capture the branching structure or the hierarchical organization of individual roots,  
80 which provide a much more comprehensive description of RSA. Recently, a system for multi-  
81 view scanning and subsequent computational analysis, known as DIRT/3D [12], was proposed to  
82 measure detailed traits of maize root crowns. The system can report 18 traits that concern the  
83 geometry of the stem (e.g., diameter and depth), the upper whorls (e.g., inter-whorl distance) and  
84 their individual nodal roots (e.g., length, angle and diameter). An inherent challenge for multi-  
85 view reconstruction, due to occlusion, is resolving densely packed roots. As a result, DIRT/3D  
86 does not provide a full root hierarchy of the root crown beyond the nodal roots.

87  
88 To our knowledge, DynamicRoots [32] is the only published and validated root phenotyping  
89 method that produces a full branching hierarchy and root traits associated with each hierarchy  
90 level in 3-dimensions. DynamicRoots is designed for a time-series of root systems grown in  
91 transparent gel [17]. These seedling-stage root systems tend to have a relatively simple geometry  
92 and structure, which makes it possible to obtain high quality 3D reconstructions using multi-view  
93 imaging [39]. DynamicRoots first employs graph analysis on the voxelized root system at each  
94 time-point to identify the root branches. Hierarchical relations among the branches are first  
95 determined by the length of the branches and then refined by the time function obtained by  
96 aligning root architectures across time. However, DynamicRoots makes two assumptions that  
97 limit its application to other types of root images. First, the input shapes can only have a mild  
98 amount of topological errors, including disconnected root components (e.g. due to limits in  
99 resolution), root branches forming loops due to touchings (e.g. due to limits in resolution and  
100 noise), and voids of space surrounded by the surface of the root (e.g. due to high optical density



101 of the root). Second, the time series must be dense enough to observe the correct root hierarchy.  
102 Neither assumption may hold for other imaging setups, such as X-ray CT or MRI scans of  
103 complex roots, which may lead to numerous topological errors after image segmentation and  
104 have few, and often a single, time point available.

105

106 In this work, we present TopoRoot, a method for obtaining the complete root hierarchy and  
107 computing the associated traits from a single 3D X-ray CT scan of excavated maize root crowns.  
108 TopoRoot adopts a multi-step approach to treat the topological errors in the input image, and it  
109 computes the hierarchy and traits using a high-fidelity skeleton representation of the root system  
110 architecture. Our method builds on state-of-the-art algorithms from computer graphics and  
111 introduces customized heuristics tailored to the image features and the maize root structure.

112

113 On a set of X-ray CT scans of 45 excavated maize root crowns where manual measurements of  
114 nodal root counts were made, TopoRoot shows dramatic improvements in accuracy compared to  
115 DynamicRoots. As a demonstration of the utility of TopoRoot, several of TopoRoot's fine-  
116 grained traits showed an ability to differentiate between two groups of genetically differentiated  
117 species within this data set. On another set of 495 maize root images simulated by  
118 OpenSimRoot [24] with varying age, complexity, and noise level, TopoRoot exhibits improved  
119 accuracy in a variety of coarse-grained and fine-grained traits over GiaRoots [33] and  
120 DynamicRoots.

121

122 TopoRoot is completely automated and has only a few parameters to set. On a standard desktop  
123 computer, TopoRoot runs within a few minutes for images at the resolution range of  $400^3$ . This

124 makes TopoRoot suited for batch processing a large set of images in a high-throughput analysis  
125 pipeline. The software package is freely distributed on GitHub with our test dataset.

## 126 Material and Methods

### 127 Data preparation

#### 128 **Fig. 1**

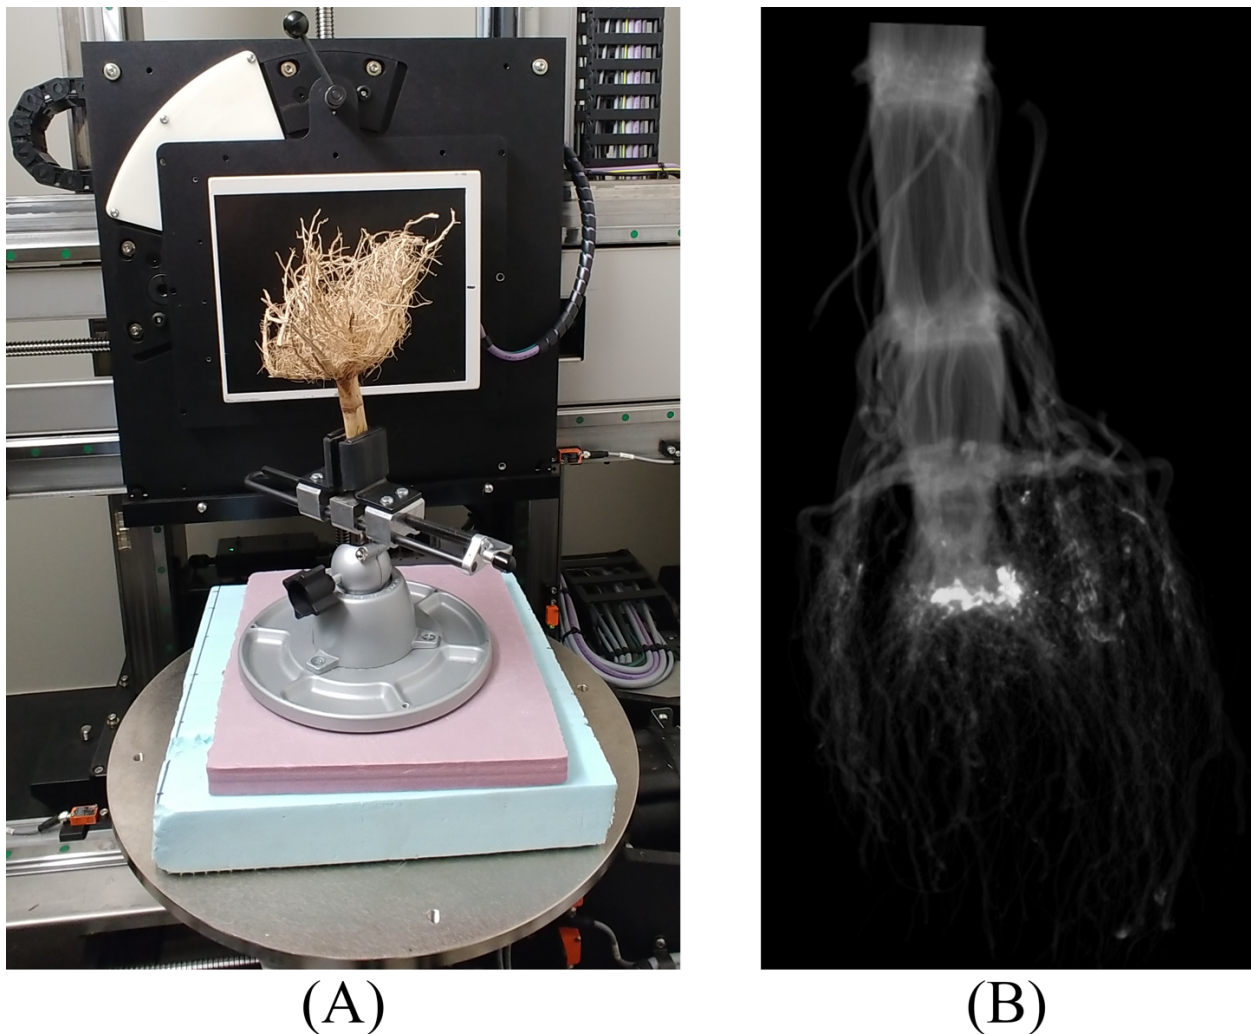

130 Picture of the X-ray setup. (A) Each maize root crown was clamped and placed on a turntable,  
131 which was rotated for 3 minutes while radiographs were collected at a rate of 10 frames per

132 second. (B) efX-CT software was used to reconstruct the scan into a 3D grayscale volume  
133 (pictured).

134 The main data set used for validation consists of 59 maize roots which were planted in June 2020  
135 at Planthaven Farms in O’Fallon, Missouri (latitude 38.84871204483824, longitude -  
136 90.68711352048403) in silt loam soil. Fields received fertilization with ammonium nitrate. Seeds  
137 were planted using jabtype planters into 3.65-m long rows (~25.4-cm within row spacing) on  
138 0.9144-meter row-to-row spacing. The maize plants (Rt1-2.4 MUT) that had mutation on the  
139 *Rootless1* gene are known to have decreased nodal root counts [16] compared to their wild-type  
140 counterparts (Rt1-2.4 WT). After 54-57 days of growth, the roots were excavated using the  
141 Shovelomics protocol [34] in September 2020 and washed to remove soil. We used an X5000 X-  
142 ray imaging system and efX-DR software (NSI, Rogers, MN) to collect X-ray computed  
143 tomography (XRT) data (pictured in Figure 1). The X-ray source was set to a voltage of 70kV,  
144 current of 1700 $\mu$ A, and focal spot length of 119 $\mu$ m. Samples were clamped and placed on a  
145 turntable for imaging at a magnification of 1.17X and 10 frames per second (fps), collecting  
146 1800 16-bit digital radiographs over a 3 minute scan time. efX-CT software was used to  
147 reconstruct the scan into a 3D volume at 109 $\mu$ m voxel resolution. This volume was exported as a  
148 16-bit RAW volume. Following imaging, manual counts were collected for the nodal roots. Each  
149 sample was dissected starting at the highest node (stalk end) moving downward to the root tips.  
150 Only attached roots were counted towards the total number of developed roots at each node.  
151 Finally, 14 scans were removed from the analysis due to excessive soil present in the imaging  
152 and missing whorls. The remaining 45 scans and their manual nodal root counts provide  
153 validation for TopoRoot’s computed values.

154 It is generally difficult to obtain manual measurement of fine-grained root traits beyond counting  
155 the nodal roots. To validate other fine-grained traits produced by our method, we supplement the

156 real data set with a systematically created set of simulated root images. We adopt OpenSimRoot  
157 [24], a highly customizable 3D root growth simulation software that has been widely used in  
158 modeling and visualizing root growth [11, 31, 7]. We used OpenSimRoot to create 55 maize  
159 roots ranging in days of growth from 30 to 40 days, numbers of nodal roots ranging from 31 to  
160 69, number of whorls from 5 to 6, and lateral root branching frequency from 0.3 to 0.7 cm /  
161 branch. The diameter of the stem was set to be 2 cm, starting diameter for nodal roots is 0.3 cm  
162 (gradually decreasing to 0.1 cm after 10 days of growth), lateral roots is 0.04 cm, and fine lateral  
163 roots is 0.02 cm. OpenSimRoot provides a detailed hierarchy for each of the simulated roots,  
164 from which we obtain the ground-truth traits.

165 **Fig. 2**

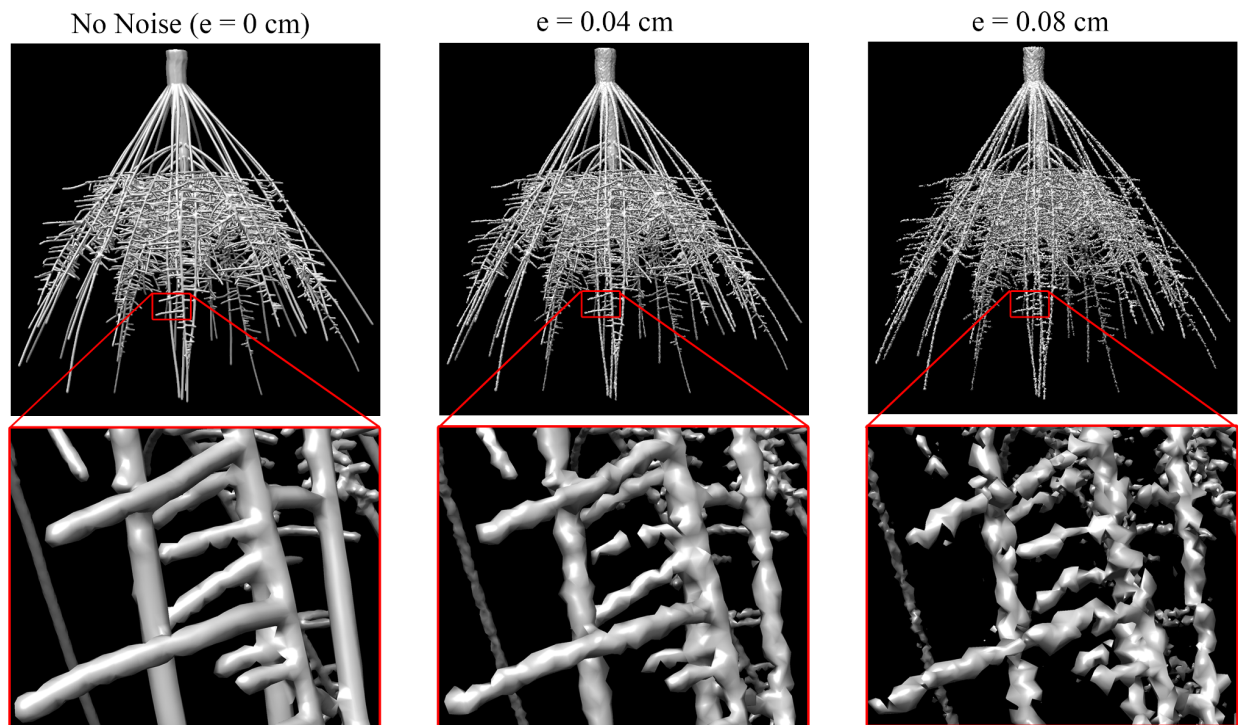

166  
167 Iso-surfaces (at level 0) of simulated maize root images with increasing amounts of noise ( $e$ ).  
168 The example is at 40 days of growth. The closeups show fine lateral roots. With increased noise,  
169 the roots exhibit less regular geometry and more topological errors (e.g., disconnections and  
170 loops).

171 For each simulated root, we create a  $512^3$  image by computing the signed distance field from  
172 the surface of the root using the method of [35] with the inside of the surface having positive  
173 values and the outside having negative values. To simulate various levels of image noise, we  
174 randomly perturb the distance value at each voxel, with the amount of perturbation ranging from  
175 0 to 0.08 cm in 0.01 increments. This results in 9 images at increasing noise levels for each of the  
176 55 roots, and thus 495 images in total. Figure 2 shows images of one simulated root (at day 40)  
177 at different noise levels. Note that the amount of geometric irregularity and topological noise  
178 (e.g., disconnected components and loops) increase with the noise level.

### 179 Thresholding

180 Although the X-ray images have good contrast between roots and air, due to the spatial variation  
181 in the contrast, limited resolution and noise, there is typically no common threshold that can  
182 accurately capture both thicker (e.g., nodal) and thinner (e.g., lateral) roots. To obtain the best  
183 result, our method therefore asks the user to provide three thresholds, visualized in Figure 3. The  
184 shape threshold provides the best balance between capturing thick and thin roots, but it may  
185 contain many topological errors (e.g., disconnected thin roots and merged thick roots). We  
186 additionally ask for a kernel threshold (the lowest value that avoids merging of thick roots) and a  
187 neighborhood threshold (the highest value that avoids disconnecting thin roots), such that the  
188 increasing ordering of the three thresholds are neighborhood, shape, and kernel. Our method will  
189 attempt to fix topological errors at the shape threshold guided by the neighborhood and kernel  
190 thresholds. For this data set, we set the shape threshold to be 0, kernel threshold to be 0.03 and  
191 neighborhood threshold to be -0.15.

192 **Fig. 3**



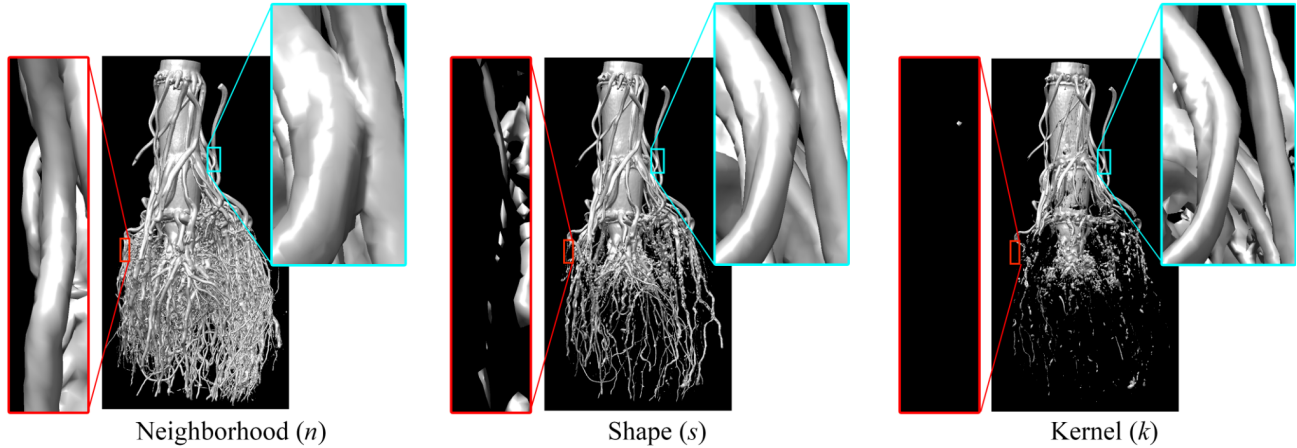

198 Overview

199 Our pipeline takes as input a 3D grayscale image with three thresholds (shape, kernel and  
200 neighborhood) and produces a hierarchy and associated traits in four steps (Figure 4):

201 1. Topological simplification: Most topological errors on the iso-surface at the shape  
202 threshold are removed by combining a global optimization algorithm [38] and a heuristic  
203 that fills in the hollow space inside the stem and other thick roots.

204 2. Skeletonization: A geometric skeleton capturing the branching structure is computed by  
205 first running an existing skeletonization algorithm [36, 37] and then removing cycles on  
206 the skeleton using a minimum-spanning tree.

207 3. Inferring hierarchy: Each skeleton branch is associated with a hierarchy level using a  
208 heuristic that favors a shallow hierarchy while encouraging longer branches at lower  
209 levels.

210 4. Computing traits: A suite of root traits, such as the count, lengths, angles, thickness, and  
211 tortuosity, are computed from the skeleton at each level of the hierarchy.

212 These steps are detailed in the next sections.

213 **Fig. 4**

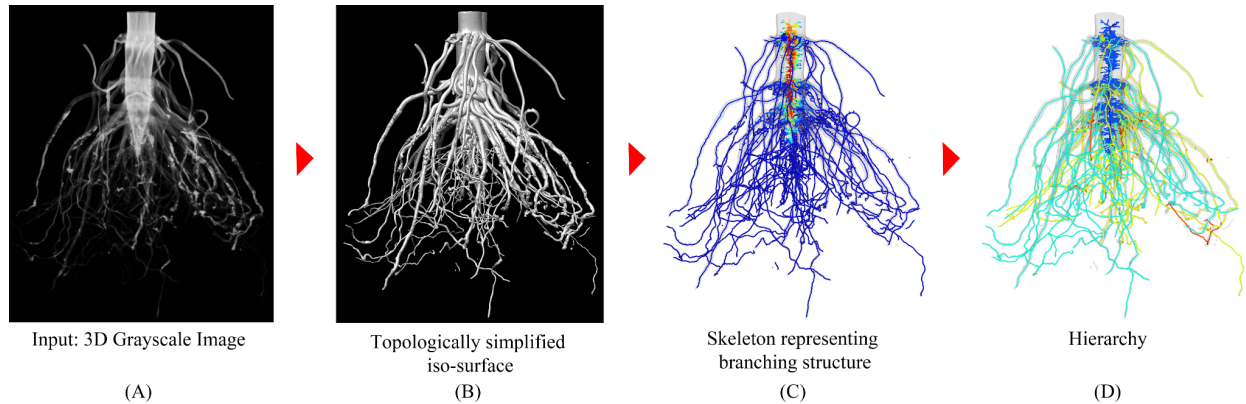

214 The pipeline of TopoRoot for computing fine-grained traits from a 3D X-ray image. Beginning  
215 from a 3D grayscale image (A), TopoRoot first simplifies the topological complexity of the iso-  
216 surface (B), then it creates a geometric skeleton capturing the branching structure (C), from  
217 which a hierarchy is obtained (D) and the traits are subsequently computed.  
218

### 219 Topological simplification

220 As shown in Figures 1 and 2, iso-surfaces of input images often contain numerous topological  
221 errors, including disconnections, loops, and voids. These errors make it challenging to infer the  
222 branching structure of the root system. We use a recent algorithm [38] to maximally remove  
223 topological errors. Given the iso-surfaces at three thresholds (shape, kernel and neighborhood),  
224 the algorithm attempts to remove all topological features on the iso-surface at the shape threshold  
225 that are not present on either of the other two iso-surfaces. The algorithm allows both addition  
226 and removal of contents to the shape's iso-surface, and it tries to minimize these geometric  
227 changes to achieve topological simplification. This algorithm can effectively connect broken  
228 branches (if they are contiguous at the neighborhood threshold) and split merged branches (if  
229 they are separate at the kernel threshold), as shown in Figure 5A and 5B.

230 A common issue in XRT scans of dried roots is that the interior space of the stem and some thick  
231 root branches often appears to be hollow. Since our subsequent analysis of the hierarchy relies on  
232 a skeleton representation of the root architecture, we need to fill in such hollow space so that the  
233 resulting skeleton captures the solid cylindrical shape of the roots (instead of only the walls).  
234 However, identifying such interior space is not straight-forward. In the ideal scenario, at the  
235 shape threshold, the wall of the stem or root branch completely separates the interior space from  
236 the outside space, making the interior space a topological void and hence easy to detect. But  
237 oftentimes the iso-surface at the shape threshold exhibits “tunnels” on the wall of the stem or  
238 branch (see Figure 5A, top-left purple box), which connect the interior space with the outside  
239 and making it impossible to identify as a topological feature. Applying the algorithm of [38] does  
240 not fill in the hollow space. On the contrary, it may merge nearby small tunnels into larger  
241 tunnels to reduce the number of topological loops (see Figure 5B, top-left).

242 **Fig. 5**

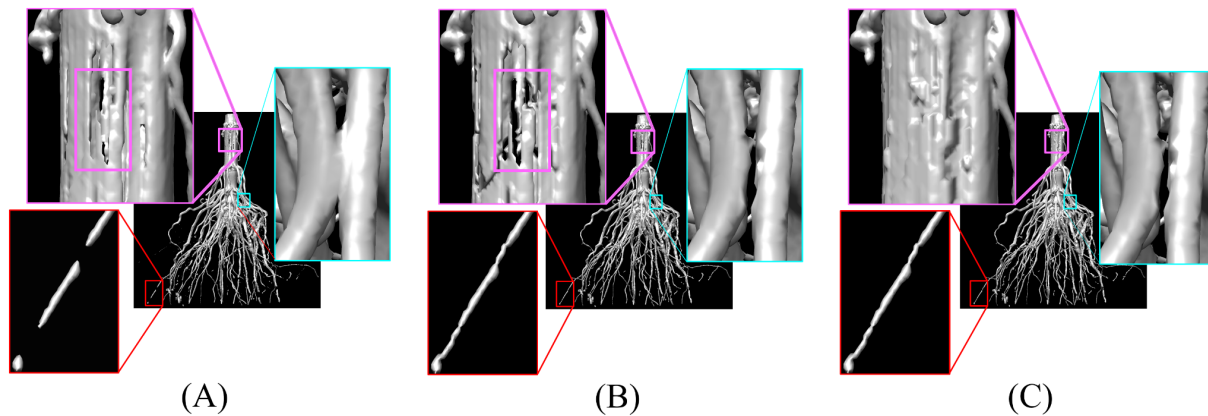

243 (A) (B) (C)  
244 Topological simplification applied to a root image. (A): The input iso-surface at the shape  
245 threshold contains numerous topological errors such as disconnections (red box) and loops (cyan  
246 box), and tunnels exist on the stem wall (highlighted in the purple box) that connect the hollow  
247 interior space to the outside. (B): Applying the algorithm of [38] resolves the disconnections and  
248 loops (red and cyan boxes), but the hollow space inside the stem remains connected to the  
249 outside through tunnels (highlighted in the purple box). (C): By applying the filling heuristic  
250 prior to calling [38], the stem’s interior is filled in without introducing new topological errors.



251 We develop a simple heuristic to identify and fill the hollow interior spaces. Our assumption,  
252 based on observation of our data, is that such spaces usually become topological voids at the  
253 lower, *neighborhood* threshold (see Figure 6A). These voids, however, are usually smaller than  
254 the hollow space at the shape threshold, and hence need to be expanded before filling in. To do  
255 so, we first erode the set of all voxels above the neighborhood threshold, noted as  $V_n$ , onto the set  
256 of voxels above the shape threshold, noted as  $V_s$ , while preserving the topology of  $V_n$ . The  
257 erosion is prioritized by the intensity, such that voxels having lower intensity are eroded earlier.  
258 The eroded voxel set, denoted as  $V_n'$ , consists of  $V_s$  and a minimal set of voxels needed to achieve  
259 the topology of  $V_n$ , denoted as  $V_f$  (colored red in Figure 6B). We then fill each void of  $V_n'$ , as  
260 well as those voxels in  $V_f$  adjacent to these voids (see Figure 6C). Since filling may introduce  
261 additional topological errors, such as loops or new voids, we call the heuristic prior to applying  
262 the algorithm of [38]. This produces a topologically simple root shape with filled stems and  
263 branches (see Figure 6C).

264 **Fig. 6**

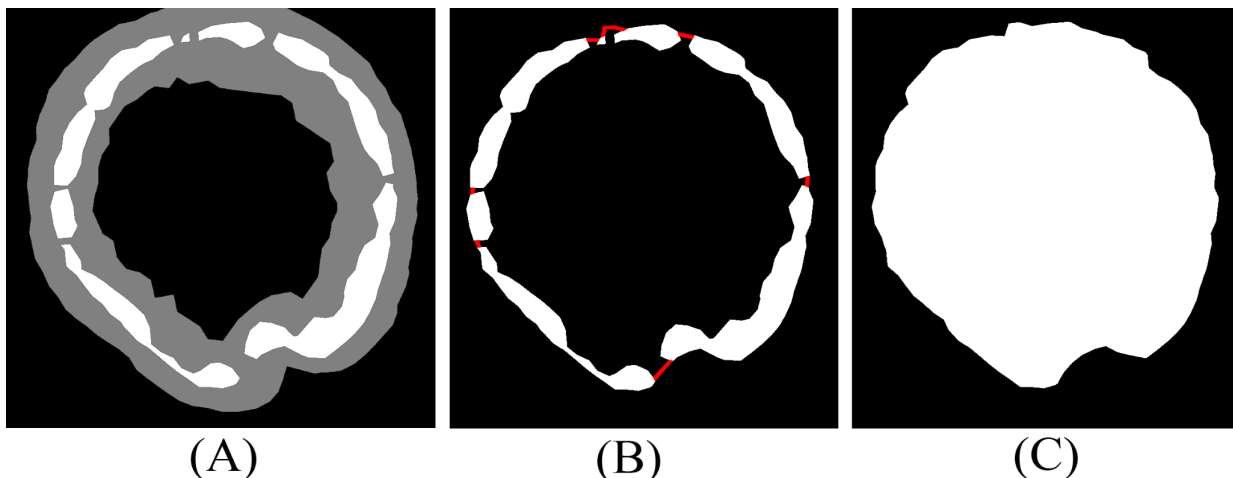

265  
266 Filling the hollow space inside the stem and thick branches. (A) A cross section of a stem,  
267 showing voxels at or above the shape threshold (white, denoted by  $V_s$ ) and voxels at or above the  
268 neighborhood threshold (gray, denoted by  $V_n$ ). Note that the hollow interior of the stem is  
269 connected to the outside space in  $V_s$ , but it forms a void disconnected from the outside in  $V_n$ . (B)

270 The result of a topology-preserving erosion of  $V_n$  onto  $V_s$ , denoted by  $V_n'$ , which consists of  $V_s$   
271 (white) and additional voxels (red) needed to retain the topology of  $V_n$ . (C) The voids of  $V_n'$ , as  
272 well as any voxels that are in  $V_n'$  but not in  $V_s$  (denoted  $V_f$ ) are filled in.

273 Not all topological errors will be removed at the end of this step. In particular, the algorithm of  
274 [38] will retain those topological features (e.g., loops) that exist on all three thresholds (shape,  
275 kernel, and neighborhood). Removing these larger-scale errors often requires more careful  
276 analysis of the root architecture, for example, to prevent breaking a root in the middle. We shall  
277 address these remaining issues in the next step of our pipeline and with the help of a geometric  
278 skeleton.

### 279 Skeletonization

280 To obtain the root hierarchy and associated traits, our method relies on a representation of the  
281 root system as a curve skeleton - a connected set of curves lying in the center of the root  
282 branches and capturing the branching structure. While there are many algorithms for computing  
283 skeletons of 3D shapes, we adopt the methods of [36, 37] because of their scalability to high-  
284 resolution iso-surfaces, robustness to noise, and the final representation as an embedded graph  
285 (with vertices and edges) which is more convenient for connectivity analysis than voxel-based  
286 skeletons. These methods have been previously adopted in skeleton-based phenotyping of  
287 sorghum panicles [9]. Specifically, given the topologically simplified iso-surface produced by  
288 the previous step, [37] computes a 2-dimensional centered structure known as the medial axis,  
289 and [36] further reduces the medial axis to 1c-dimensional curves. The resulting skeleton is also  
290 associated with shape attributes, including the thickness and the width of the tubular cross-  
291 sections, which are useful in our subsequent analysis. An example is shown in Figure 4C (also in  
292 Figure 7A).

293 **Fig. 7**

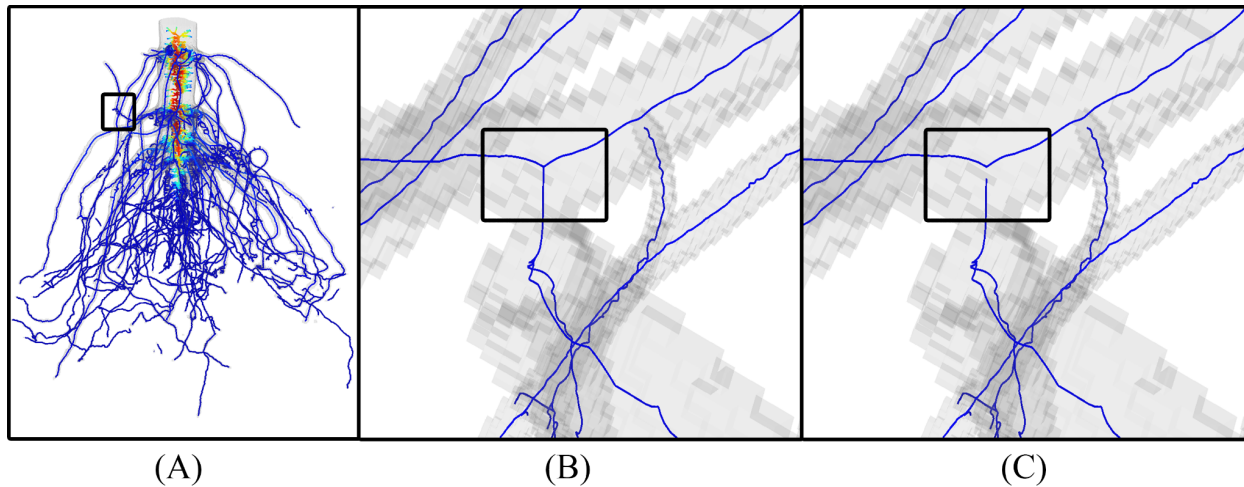

294 (A) A curve skeleton computed by the methods of [36,  
295 37], where color indicates the thickness of the roots (redder curves lie in thicker roots). (B) A  
296 skeleton junction (in the boxed region in (A)) caused by merging between two roots in the iso-  
297 surface, which leads to a cycle in the skeleton. (C) The cycle is removed by detaching a skeleton  
298 segment from the junction.  
299

300 As mentioned earlier, some topological errors remain after topological simplification. These  
301 errors manifest as disconnected components and cycles (a path of edges which begin and end at  
302 the same vertex) on the curve skeleton. To reduce the number of components to one, we simply  
303 take the largest connected component on the skeleton. To remove cycles in that component, we  
304 observe that cycles are usually caused by merging of distinct roots, which take place at junctions  
305 (vertices with degree three or higher) on the skeletons (Figure 7B). Our goal is to identify  
306 junctions that correspond to merging between roots, as opposed to natural branching of roots,  
307 and resolve the cycles by detaching skeleton segments from such junctions (Figure 7C). This is  
308 achieved by computing the minimum spanning tree (MST) on a weighted graph, as described  
309 below.

310 As we are primarily concerned with the junctions of the skeleton, we construct an abstract graph  
311 where each node represents either a junction vertex or a continuous skeleton segment between

312 junctions (Figure 8A, 8B). A graph edge connects a node representing a skeleton junction with  
313 another node representing a skeleton segment incident to the junction. Removing a graph edge  
314 corresponds to detaching a skeleton segment from a junction (Figure 8C, 8D).

315 **Fig. 8**

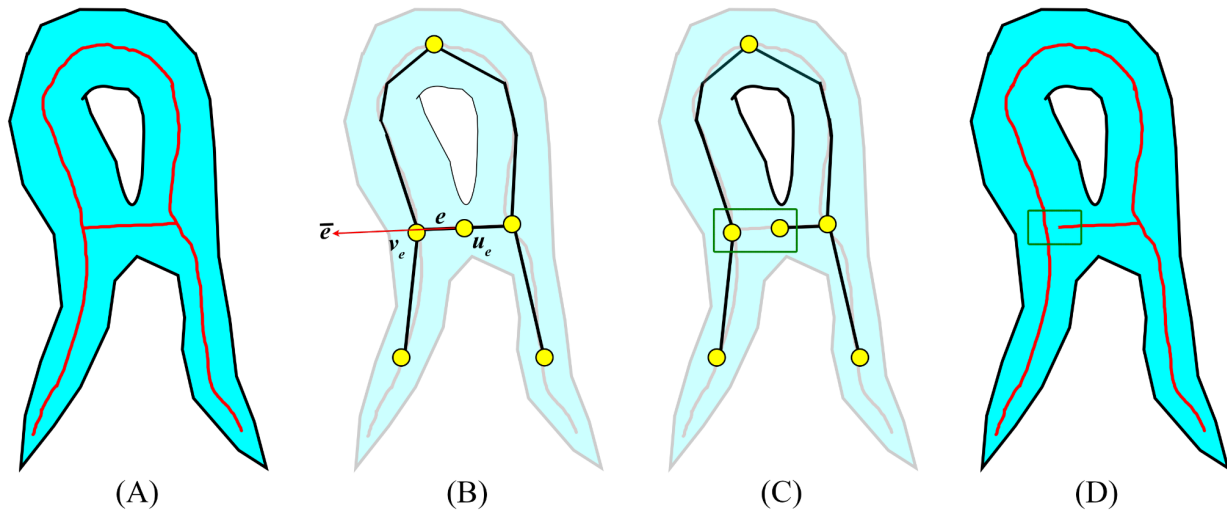

316 (A) Illustration of our cycle-breaking algorithm. (A) A curve skeleton (red) of a synthetic root  
317 system (blue) that contains a cycle. (B) A graph that represents each skeleton junction or  
318 segment by a node (yellow circle) and connects two nodes representing a junction and an  
319 incident segment by an edge (black line).  $e$  is a graph edge,  $v_e$  is the node  $e$  that represents a  
320 skeleton junction,  $u_e$  the other node of  $e$  which represents a skeleton segment, and  $\underline{e}$  is the unit  
321 vector of the tangent direction of the skeleton segment represented by node  $u_e$  towards the  
322 junction node  $v_e$ . (C) The MST of the graph removes the cycle by excluding an edge (green  
323 box). (D) The corresponding skeleton segment is detached from the skeleton junction.  
324

325 The MST is the subset of edges such that all graph nodes remain connected and the sum of edge  
326 weights is minimal. An MST is always free of cycles. We define the edge weights such that a  
327 lower weight implies a higher likelihood that a skeleton segment should be attached to a  
328 junction. Our weight definition is motivated by the observation that a merging between two  
329 distinct roots often results in a “T” junction on the skeleton where, among all skeleton segments  
330 incident to the junction, one segment (which should be detached) is close to being orthogonal to  
331 the other segments (see Figure 8B). In contrast, a typical branching of the root usually results in  
332 a “Y” junction on the skeleton where each skeleton segment at the junction forms an obtuse

333 angle with at least one other segment. However, branching close to the stem of the root could be  
334 more like “T” than “Y”, due to the large difference in thickness between the main and offspring  
335 roots. Our weight encourages “Y” junctions while preventing detachment close to the stem.

336 Specifically, let  $e$  be a graph edge,  $v_e$  the node of the edge  $e$  that represents a skeleton junction,  
337  $u_e$  the other node of  $e$  which represents a skeleton segment, and  $E(v)$  the set of edges incident to  
338 node  $v$ . We denote by  $\bar{e}$  the unit vector of the tangent direction of the skeleton segment  
339 represented by node  $u_e$  towards the junction node  $v_e$ . We first define the angle deviation term  
340  $w_{angle}$  as:

$$341 \quad w_{angle}(e) = \min_{e' \in E(v_e), e' \neq e} \left( 2 - (1 + \bar{e} \cdot \bar{e}') \right).$$

342 This term reaches the minimal value of 0 when there is some edge  $e'$  incident to  $v_e$  that has the  
343 same direction as  $e$ , and it attains the maximal value of 2 when all other edges incident to  $v_e$   
344 have the opposite direction as  $e$ . Next, we define  $w_{dis}(e)$  as the shortest distance along the  
345 skeleton between the skeleton junction represented by  $v_e$  and any skeleton vertex in the stem.  
346 Here, we extract the stem from the skeleton using the heuristic reported in [9]. The heuristic  
347 starts from a subset of the skeleton whose thickness measure is above a threshold (since the stem  
348 is usually the thickest portion of the maize root system) and extracts the longest simple path from  
349 the subset. Finally, the edge weight is defined as:

$$350 \quad w(e) = \lambda w_{dis}(e) + w_{angle}(e).$$

351 Here  $\lambda$  is a balancing parameter, which is set to 0.05 in our experiments.

352 Inferring hierarchy

353 **Fig. 9**

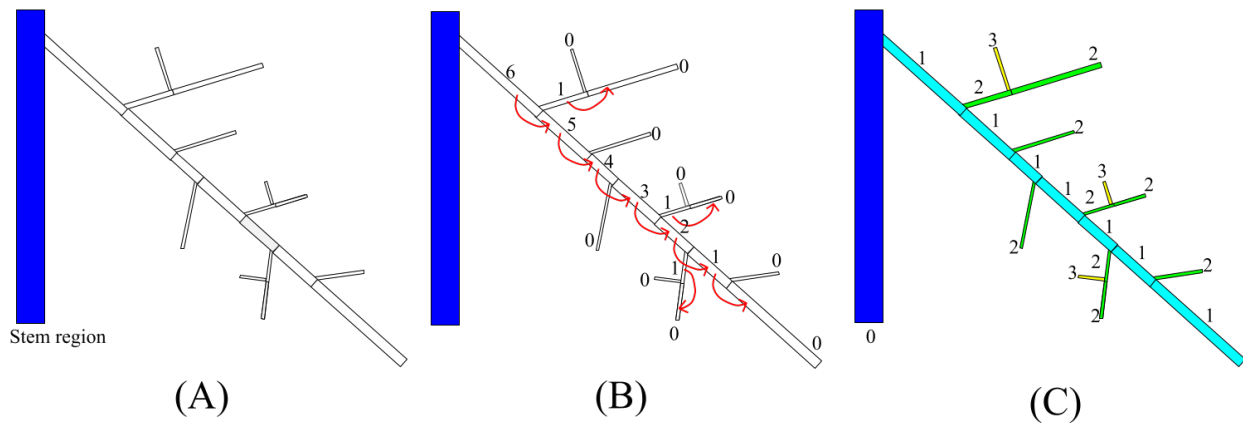

354  
355 Heuristic for inferring hierarchy on a cycle-free skeleton. (A) The input skeleton with only the  
356 stem region labelled (blue). (B) The first stage associates each parent segment with one of its  
357 children segments (indicated by arrows). The numbers are the depth stored at each segment, an  
358 intermediate quantity used to determine the parent-child association. (C) The second stage  
359 assigns hierarchy levels to each skeleton segment based on the parent-child association.

360 A key feature of TopoRoot is computing the hierarchy of the maize root system consisting of the  
361 stem, nodal roots, and lateral roots at different levels. Given the cycle-free skeleton computed  
362 from the previous steps, we next label each vertex of the skeleton as either part of the stem path,  
363 the stem region, a nodal root, or a lateral root at a specific level. As described in the previous  
364 step, the stem path is identified using the thickness-based heuristic of [9]. The stem region is then  
365 defined as the set of skeleton edges within a cylindrical region around the skeleton path, where  
366 the radius of the cylinder varies along the stem path and is set to be 1.6 times the thickness  
367 measure stored on the path vertices. In Figure 4D, the stem path and stem region are colored dark  
368 blue.

369 To label the remaining skeleton edges by the root hierarchy (e.g., nodal roots, 1st-order lateral  
370 roots, 2nd-order lateral roots, etc.), we make the following two assumptions. First, as assumed in  
371 previous works including DynamicRoots, roots at lower levels of the hierarchy are generally  
372 longer. For example, nodal roots are generally longer than lateral roots, and 1st-order lateral

373 roots are generally longer than 2nd-order lateral roots, and so on. Second, the maximum number  
374 of hierarchy levels in a root system is generally kept low. With these assumptions, we developed  
375 a labelling heuristic that minimizes the maximal level of hierarchy in the root system while  
376 encouraging longer roots to be at lower levels.

377 Our heuristic proceeds in two stages, a bottom-up traversal of the skeleton and then a top-down  
378 traversal. They are illustrated in Figure 9 using a cartoon example. We start with a skeleton  
379 labelled only by the stem region (Figure 9A). Since the skeleton has no cycles, it is a “tree”. We  
380 consider the stem region as the “root” of this tree, and this induces a partial ordering of the  
381 skeleton segments such that each skeleton junction (outside the stem region) is incident to  
382 exactly one *parent* segment and zero or more *children* segments. The first stage of the heuristic  
383 computes, at each skeleton junction, the association between the parent skeleton segment with  
384 one of the children segments as the continuation of the same root (see arrows in Figure 9B). The  
385 association is computed by visiting the skeleton segments from the leaves of the skeleton  
386 towards the stem and updating a depth  $d(b)$  (numbers in Figure 9B) and a distance  $l(b)$  at each  
387 visited segment  $b$ , as follows. First, for each segment  $b$  incident to a leaf vertex of the skeleton,  
388 we set  $d(b)=0$  and  $l(b)$  as the length of the segment  $b$ . We then iteratively visit parent segments  
389 whose children segments have already been visited. For a parent segment  $b$  whose children are  
390  $b_1, \dots, b_n$ , we associate  $b$  with the child  $b_i$  that has the maximal depth  $d(b_i)$ . If multiple children  
391 have the same maximal depth,  $b$  is associated with the  $b_i$  with maximal length  $l(b_i)$ . We then set  
392  $d(b)=d(b_i)+1$  and  $l(b)$  to be  $l(b_i)$  plus the length of segment  $b$ . In the second stage, we visit all  
393 segments from the stem to the leaves and assign the hierarchy levels. We assign each segment  
394 attached to the stem region a hierarchy level of 1 (i.e., nodal roots). For each parent segment  
395 assigned with level  $k$ , we assign level  $k$  to the child segment associated with the parent

396 (computed from the first stage) and level  $k + 1$  to all other children segments. The resulting  
397 hierarchy labelling is shown in Figure 9C both as numbers and the heat color (warmer colors  
398 have higher levels).

### 399 Computing traits

400 Given the skeleton and the hierarchy labelling, TopoRoot computes a suite of coarse-grained and  
401 fine-grained traits of the root system. Like existing works (e.g. [33]), we compute global traits  
402 which are aggregated over all the hierarchy levels, including the total root length, number of  
403 roots, and average root length. For fine-grained traits, for each hierarchy level (e.g., nodal roots,  
404 1st-order lateral roots, 2nd-order lateral roots, etc.), we compute the root count, average and total  
405 root length, average root tortuosity, average root thickness, average number of children, and the  
406 average emergence, midpoint, and tip angle. We also report the length and thickness of the stem.  
407 Some of these traits, such as stem length and per-level angle traits, have not been previously  
408 reported by existing tools (including DynamicRoots [32]). Details on how each of these traits is  
409 computed can be found in supplementary table 1.

## 410 Results

411 We validated TopoRoot on the aforementioned dataset and compared it with some previous  
412 tools, including DynamicRoots [32] (for both global and fine-grained traits) and a 3D version of  
413 GiaRoots [4] first published in [33] (for global traits only). We used default parameters for both  
414 DynamicRoots and GiaRoots. DynamicRoots requires a “seed” voxel, which we set as a random  
415 voxel from the top slice. We ran DynamicRoots and GiaRoots on the thresholded images at the  
416 shape threshold. To illustrate the effect of topological errors on these tools, we extend each tool



417 by first performing the topological simplification step of TopoRoot. We call the extended tools  
418 DynamicRoots+ and GiaRoots+ respectively. TopoRoot is implemented in C++, and all  
419 experiments were run on a Windows 10 machine with an Intel(R) Core(TM) i9-10900X  
420 Processor @ 3.70 GHz and 64.0 GB of memory (RAM).

#### 421 Excavated root crowns

422 First, we visually compare the root hierarchies computed by TopoRoot, DynamicRoots, and  
423 DynamicRoots+ for a randomly picked root crown (Figure 10). DynamicRoots produces a point  
424 cloud where each point represents an input voxel and is labelled by its hierarchy level (0, 1, 2,  
425 etc.). As explained in [32], the hierarchy levels produced by DynamicRoots reflect the geometric  
426 branching structure and may not map well to the biological hierarchy (e.g., stem, nodal roots,  
427 lateral roots, etc.). For this reason, as well as the inaccuracy in determining hierarchy without a  
428 dense time series and the different morphology of mature root crowns in our dataset from those  
429 of seedlings grown in a gel environment (for which DynamicRoots was designed),  
430 DynamicRoots tends to produce significant mis-classifications of root branches in our dataset.  
431 For example, the level-0 roots obtained by DynamicRoots include not only the stem but quite a  
432 few nodal roots (black boxes). These errors propagate to higher-level roots, which fork from  
433 lower-level roots. In addition, since the thresholded root image at the shape threshold contains  
434 many disconnected components, and because DynamicRoots only considered one connected  
435 component, a significant portion of the root is missing in the analysis of DynamicRoots (red  
436 box). Although performing the topological simplification step in TopoRoot allows  
437 DynamicRoots+ to recover a more complete root system, mis-labelling of hierarchy levels  
438 remains (black boxes). In contrast, TopoRoot produces a more visually plausible hierarchy  
439 separating the stem (region), nodal roots, and lateral roots.

440 **Fig. 10**

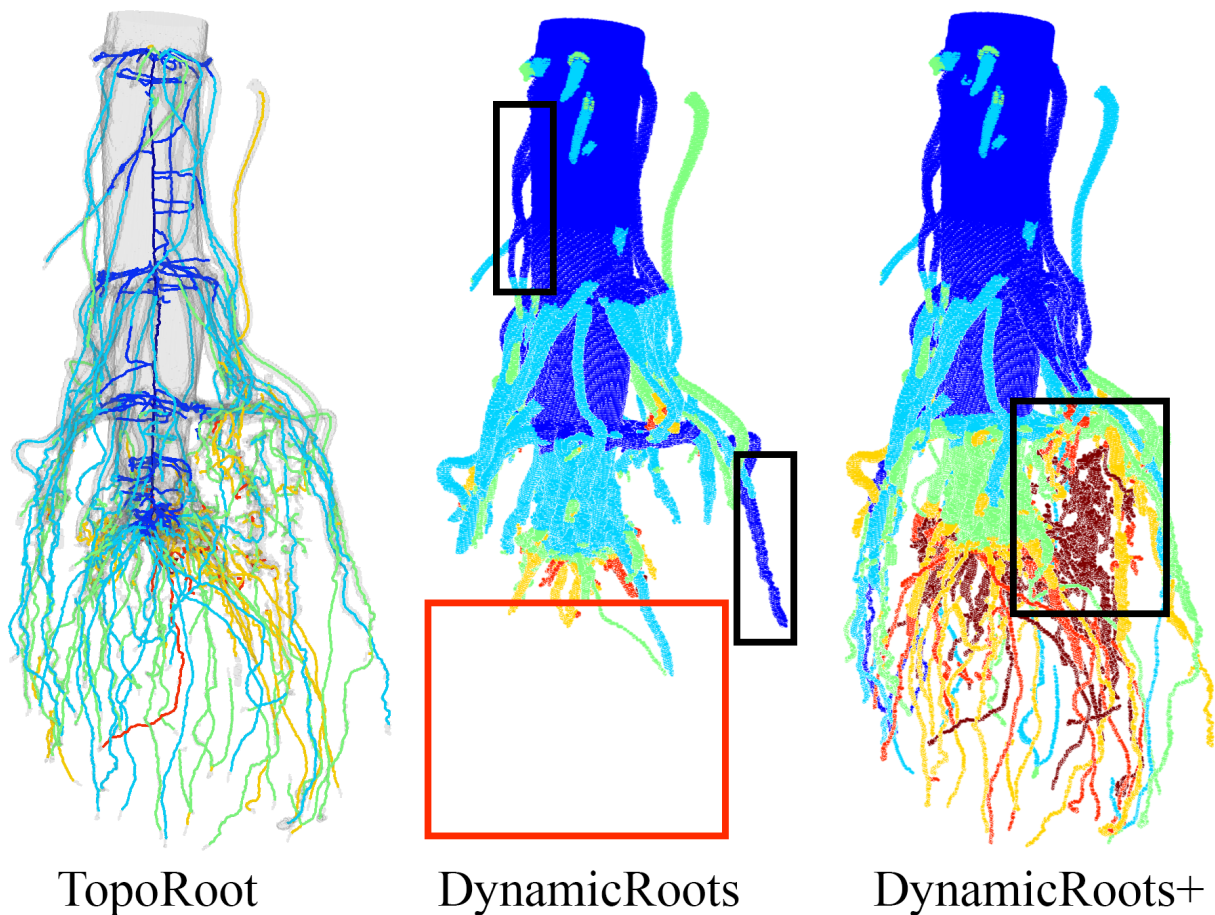

441

442 Visual comparison of root hierarchies computed by TopoRoot, DynamicRoots and

443 DynamicRoots+ from the X-ray CT scan of an excavated maize root crown. Hierarchy levels are

444 colored as follows: 0 (stem): dark blue, 1 (nodal roots): light blue, 2 (1st-order lateral roots):

445 green, 3 (2nd-order lateral roots): orange, 4 (3rd-order lateral roots): red,  $\geq 5$ : dark red. Black

446 boxes highlight incorrect levels obtained by DynamicRoots and DynamicRoots+, and the red box

447 highlights a missing component in DynamicRoots.

448 Next, we quantitatively validate the nodal root counts computed by various tools against the

449 hand measurements. Figure 11 plots the correlation between the hand-measured nodal root

450 counts and those computed by TopoRoot (A), DynamicRoots (B) and DynamicRoots+ (C) for all

451 45 samples. Based on visual inspection (Figure 10), we consider the level 1 branches as nodal

452 roots for DynamicRoots+. For each sample we computed the relative error by taking the absolute

453 difference of TopoRoot's nodal root count and the hand measurement, and finding the

454 percentage of this difference relative to the hand measurements. We compute the mean and  
455 standard deviation ( $\sigma$ ) of this relative error for TopoRoot, DynamicRoots, and DynamicRoots+.  
456 TopoRoot exhibits a much lower relative error (mean=8.3%,  $\sigma = 5.6\%$ ) and higher correlation  
457 (Pearson's coefficient=0.951) than either DynamicRoots (159.5% mean error with  $\sigma = 190.0\%$ ,  
458 Pearson's coefficient=-0.0452) or DynamicRoots+ (235.4% mean error with  $\sigma = 244.4\%$ ,  
459 Pearson's coefficient=-0.160). The significant over-counting of DynamicRoots+ is mostly  
460 caused by the mislabeling of nodal roots as level-0 roots, as explained above, which leads to  
461 many lateral roots being labelled as level-1 roots. The over-counting also increases with the size  
462 of the root system. Furthermore, both the nodal root counts computed by TopoRoot and the hand  
463 measurements exhibited a significant difference between the mutant and wild type samples, as  
464 measured by the independent two-sided Wilcoxon rank sum test ( $p=0.000130$  for TopoRoot,  
465  $p=0.00349$  for hand measurements). Neither DynamicRoots ( $p=0.126$ ) nor DynamicRoots+  
466 ( $p=0.0199$ ) showed a significant difference between the mutant and wild-type, and both had  
467 negative Pearson coefficients. This shows that TopoRoot can perform better for differentiating  
468 the root system architecture between these two varieties than can DynamicRoots.

469 **Fig. 11**

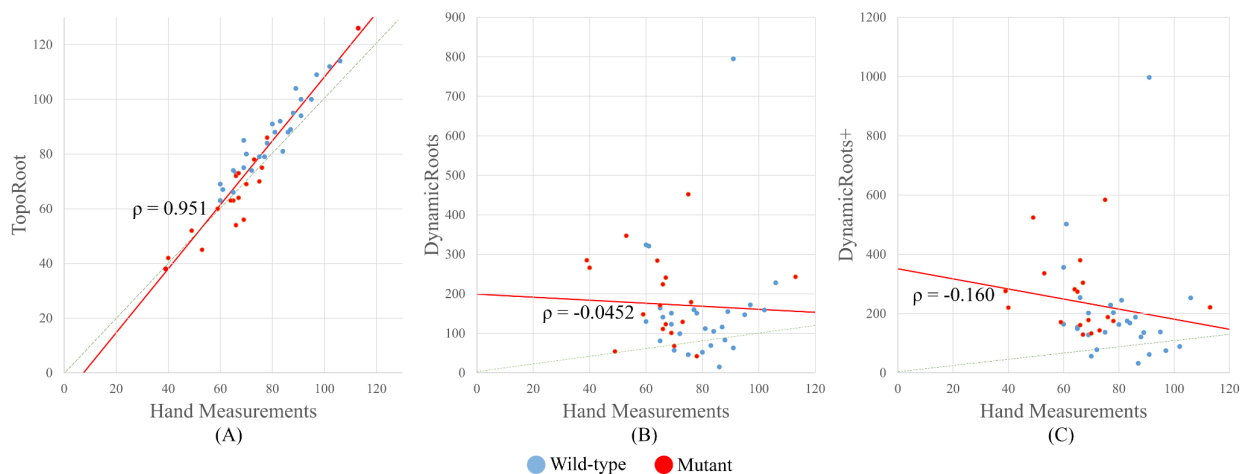

470 Correlation of nodal root count between hand and computational measurements. (A) Correlation  
471

472 between TopoRoot and hand measurement. (B) Correlation between DynamicRoots and hand  
473 measurement. (C) Correlation between DynamicRoots+ and hand measurement. Each dot in the  
474 graph represents one of the 45 samples. Blue and red dots indicate wild type and mutant samples,  
475 respectively. The regression line is in red, while the dashed green line indicates the ideal  
476 correspondence between the hand and computational measurements. The correlation coefficient  
477  $\rho$  is indicated in each plot.

478 Since we do not have hand measurements of other fine-grained traits for this data set, we  
479 perform an indirect evaluation by assessing the ability of each trait computed by TopoRoot in  
480 differentiating the mutant and wild type samples. As shown in Figure 12, 12 out of the 23 fine-  
481 grained traits computed by TopoRoot (reported up to the hierarchy level of the first-order lateral  
482 roots) exhibit a significant difference between the two genotypes ( $p < 0.01$ ). Compared to the wild  
483 type, the mutants generally have fewer and shorter thinner roots at each hierarchy, whereas the  
484 various angle measures are greater. These fine-grained trait differences offer a more  
485 comprehensive analysis of phenotypic differences caused by the mutation which better  
486 characterizes gene function and may lead to novel biological investigations.

487

488

489

490

491

492

493

494

495

496

497 **Fig. 12**

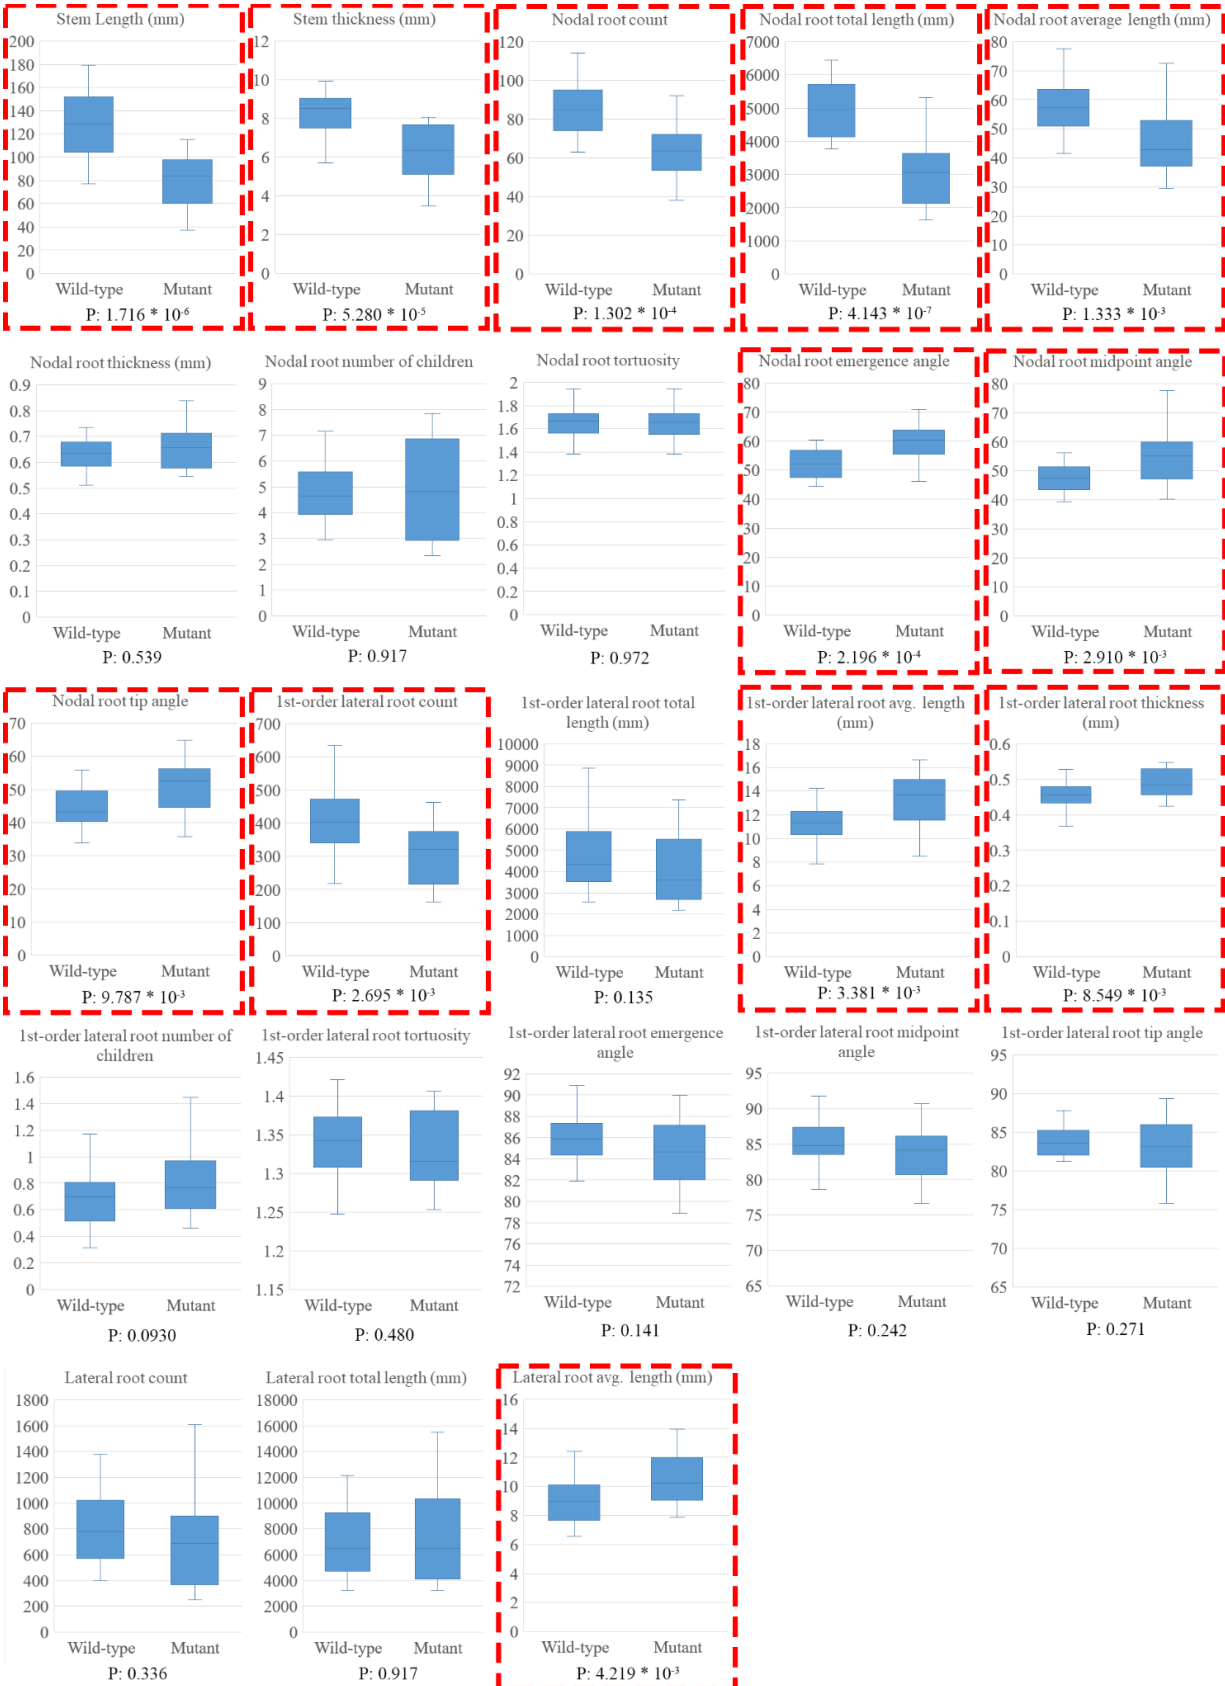

499 Fine-grained traits computed by TopoRoot for wild type and mutant samples. Each boxplot  
500 shows distribution bars for one trait over all 27 wild type samples and 18 mutants. Traits with  
501  $p < 0.01$ , as measured by the independent two-sided Wilcoxon rank sum test, are highlighted in  
502 red boxes.

### 503 Simulated Roots

504 We start with a visual comparison of the results of TopoRoot, DynamicRoots+ and GiaRoots+  
505 on one of the simulated root systems. This root system is simulated to be 34 days old, with five  
506 whorls, 34 nodal roots, and a lateral root branching frequency between 0.3 - 0.7 cm / branch.  
507 Figure 13 visualizes the root hierarchies produced by TopoRoots and DynamicRoots+ as well as  
508 the voxelized skeletons produced by GiaRoots+ at three different noise levels (0, 0.04cm,  
509 0.08cm). As the noise level increases, the thresholded image at the shape threshold becomes  
510 more disconnected and contaminated by topological errors (see Figure 13). Accordingly,  
511 DynamicRoots and GiaRoots miss more root parts, whereas TopoRoot as well as the extended  
512 tools, DynamicRoots+ and GiaRoots+, retain much of the root shape. Observe that, similar to the  
513 real roots dataset, the hierarchies produced by DynamicRoots+ incorrectly label many nodal  
514 roots as level 0 (black boxes). In contrast, the hierarchies produced by TopoRoot are more  
515 visually plausible.

516

517

518

519

520

521

522

523

524 **Fig. 13**

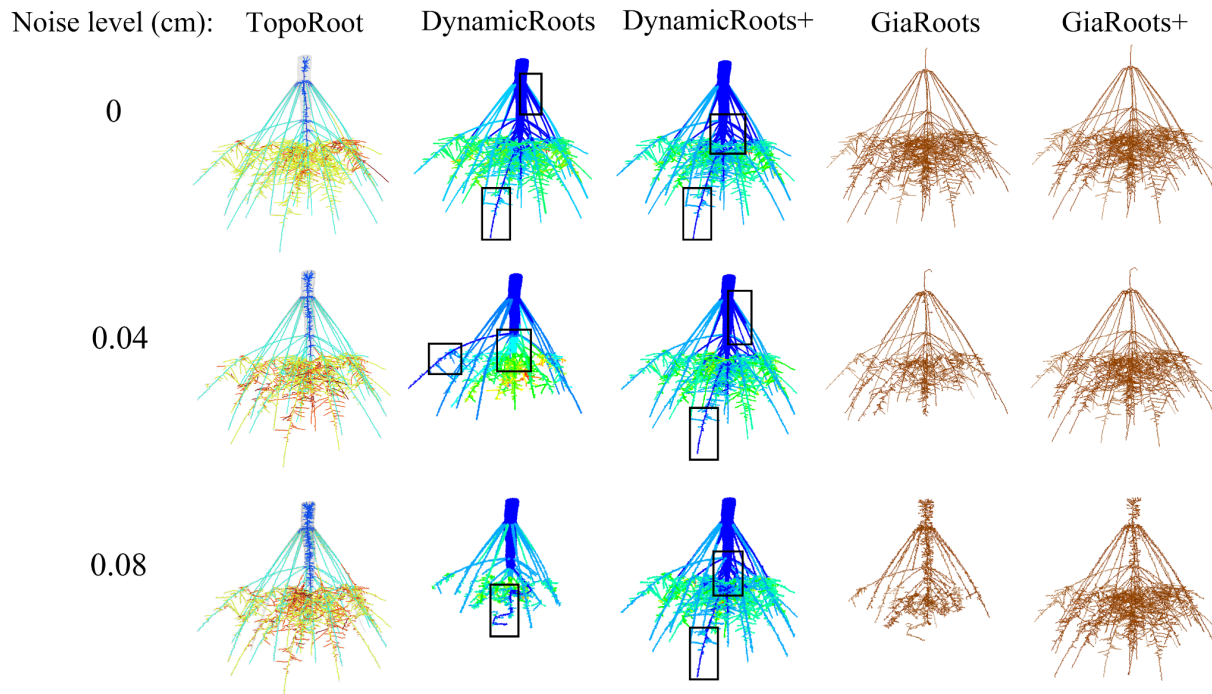

525 Comparing hierarchies and skeletons computed by different tools from images of a simulated  
526 maize root. Three different noise levels are shown. Hierarchy levels 0, 1, 2, 3 and 4 produced by  
527 TopoRoot and DynamicRoots+ are colored dark blue, light blue, green, orange, and red. The  
528 voxelized skeletons produced by GiaRoots+ are colored brown. Black boxes highlight  
529 mislabeling of nodal roots as level 0 roots by DynamicRoots and DynamicRoots+.  
530

531 We performed a thorough quantitative validation of all traits computed by TopoRoot against the  
532 ground truth provided by OpenSimRoot. The relative error for each trait over the entire  
533 simulated dataset, as well as the errors of DynamicRoots+ and GiaRoots+ (for global traits only),  
534 are reported in Tables 1-4 for noise levels  $\leq 0.04$  cm and 0.08 cm. In supplementary Figures S1-  
535 S4, we take a closer look at the accuracy of TopoRoot and the other tools as a function of the  
536 noise level of the input images. These figures plot the relative errors of the five tools in  
537 computing the stem traits (Figure S1), the nodal root traits (Figure S2), the lateral root traits  
538 (Figure S3), and the global traits (Figure S4) as the noise level increases. Roots less than one  
539 voxel long in the ground truth model were ignored in our analysis. We compare and analyze the  
540 accuracy of TopoRoot across each category of traits below. In general, we observe that higher



541 image noise leads to larger mean errors and/or greater variance by TopoRoot. For most of the  
542 traits, TopoRoot maintains a lower error than other tools across all noise levels.

543 As the base of the hierarchy, the stem traits are among the most accurate. As the noise increases,  
544 portions of the stem region are lost, resulting in a thinner stem (Figure S1). Increased noise also  
545 causes the stem to wiggle more in the direction perpendicular to its main path, resulting in an  
546 increased stem length.

547 The nodal root traits (Table 2) are the most accurate for the root count (8.3% up to  $e=0.04$ ,  
548 10.3% up to  $e=0.08$ ) and emergence and midpoint angles (5.7/7.1% up to  $e=0.04$ , 9.1/9.5% up to  
549  $e=0.08$ ). The lowest accuracy is seen for the number of children (40.0% up to  $e=0.04$ , 48.6% up  
550 to  $e=0.08$ ) and thickness (39.2% up to  $e=0.04$ , and 38.2% up to  $e=0.08$ ). These errors are due to  
551 misclassifications when the nodal root becomes entangled with higher-order lateral roots.  
552 TopoRoot slightly underestimates the average and total length due to faulty cycle breaking and  
553 misclassification errors in portions of nodal roots further away from the stem. TopoRoot's error  
554 in nodal root tortuosity is higher than that of DynamicRoots for two reasons. First, the ground  
555 truth tortuosity is close to 1 (only for the simulated data, but not for the real maize roots), and  
556 DynamicRoots coincidentally produces values close to this because it mistakes many shorter  
557 lateral roots as nodal roots, as evidenced by its much shorter average nodal root length and the  
558 black boxes of Figure 13. Second, nodal roots sometimes are misclassified by TopoRoot closer  
559 to their tips due to the large number of intersections between roots of different hierarchy levels,  
560 resulting in excessive winding. TopoRoot slightly overestimates angle measurements due to  
561 misclassification errors further away from the stem which bend the detected paths sideways;  
562 these explain the errors in the tip angle measurements.



563 The errors for the lateral root traits (Table 3) are generally larger than nodal root traits, primarily  
564 since the imaging noise has a greater impact on the thinner roots more than the thicker ones.  
565 There is a greater underestimation of both the total first-order lateral roots and their total length  
566 (Figure S3), due to both the misclassification of the hierarchy levels and the loss of many thin  
567 roots in the distance field. On the other hand, the misclassified first-order lateral roots are  
568 counted as lateral roots of higher orders, and hence less errors lie in the total lateral root count  
569 (22.2% up to  $\epsilon=0.04$  and 37.0% up to  $\epsilon=0.08$ ) and lengths (24.3% up to  $\epsilon=0.04$  and 24.4% up to  
570  $\epsilon=0.08$ ) over all orders. All methods significantly overestimate the first-order lateral root  
571 thickness due to limits in the resolution, but TopoRoot produces the lowest error. The lowest  
572 errors are seen in the first-order lateral emergence/midpoint/tip angles (3.4%/4.1%/5.4% up to  
573  $\epsilon=0.04$  and 3.0%/4.0%/5.9% up to  $\epsilon=0.08$ ) and tortuosity (4.6% up to  $\epsilon=0.04$  and 4.5% up to  
574  $\epsilon=0.08$ ).

575

576 Finally, combining nodal and lateral roots, TopoRoot produces on average 35.4% error (21.5%  
577 up to  $\epsilon=0.04$ ) in the total root count and 25.4% error (25.0% up to  $\epsilon=0.04$ ) in the total root  
578 length, which are much lower than DynamicRoots and GiaRoots (Table 4). Note that both  
579 DynamicRoots and GiaRoots significantly underestimate the root count and total length, even  
580 after topological simplification, and the amount of underestimation generally increases with the  
581 level of noise (Figure S4). The only global trait that TopoRoot does not have the lowest error is  
582 the average length, due to a combination of DynamicRoots being coincidentally closer due to its  
583 underestimation of both the total length and number of roots, and TopoRoot having an excessive  
584 number of roots at higher noise levels. These are the same reasons why the two methods have  
585 similar lateral root average length errors.

586 **Table 1: Reporting the accuracy of TopoRoot for stem traits.**

| Trait          | $\leq e$ | TopoRoot (%)          |
|----------------|----------|-----------------------|
| Stem length    | 0.04     | 6.9 ( $\sigma=6.9$ )  |
|                | 0.08     | 7.7 ( $\sigma=7.3$ )  |
| Stem thickness | 0.04     | 11.9 ( $\sigma=4.3$ ) |
|                | 0.08     | 15.3 ( $\sigma=5.8$ ) |

587 Each entry gives the average error (and standard deviation  $\sigma$ ) for our method across all simulated  
 588 models and across all noise levels up to  $e=0.04$  cm and 0.08 cm.

589 **Table 2: Comparing TopoRoot to DynamicRoots and DynamicRoots+ for nodal root traits.**  
 590

| Trait                         | $\leq e$ | TopoRoot (%)                  | DynamicRoots (%)              | DynamicRoots+ (%)           |
|-------------------------------|----------|-------------------------------|-------------------------------|-----------------------------|
| Nodal root count              | 0.04     | <b>8.3</b> ( $\sigma=8.2$ )   | 392.9 ( $\sigma=423.5$ )      | 486.2 ( $\sigma=426.6$ )    |
|                               | 0.08     | <b>10.3</b> ( $\sigma=10.9$ ) | 263.9 ( $\sigma=367.0$ )      | 455.2 ( $\sigma=400.0$ )    |
| Nodal root total length       | 0.04     | <b>22.4</b> ( $\sigma=13.1$ ) | 46.4 ( $\sigma=17.7$ )        | 38.3 ( $\sigma=14.3$ )      |
|                               | 0.08     | <b>23.9</b> ( $\sigma=13.7$ ) | 56.9 ( $\sigma=19.7$ )        | 40.7 ( $\sigma=14.6$ )      |
| Nodal root average length     | 0.04     | <b>17.8</b> ( $\sigma=11.2$ ) | 76.6 ( $\sigma=18.8$ )        | 80.9 ( $\sigma=16.1$ )      |
|                               | 0.08     | <b>19.9</b> ( $\sigma=13.1$ ) | 74.0 ( $\sigma=17.4$ )        | 81.0 ( $\sigma=15.4$ )      |
| Nodal root thickness          | 0.04     | 39.2 ( $\sigma=27.6$ )        | <b>36.6</b> ( $\sigma=33.8$ ) | 46.2 ( $\sigma=115.0$ )     |
|                               | 0.08     | <b>38.2</b> ( $\sigma=26.8$ ) | 50.1 ( $\sigma=150.3$ )       | 48.2 ( $\sigma=109.6$ )     |
| Nodal root number of children | 0.04     | <b>36.4</b> ( $\sigma=21.6$ ) | 87.7 ( $\sigma=13.7$ )        | 89.4.5 ( $\sigma=12.5$ )    |
|                               | 0.08     | <b>45.6</b> ( $\sigma=41.0$ ) | 87.0 ( $\sigma=13.1$ )        | 89.2 ( $\sigma=12.4$ )      |
| Nodal root tortuosity         | 0.04     | 32.6 ( $\sigma=13.0$ )        | 2.3 ( $\sigma=2.5$ )          | <b>2.0</b> ( $\sigma=1.8$ ) |
|                               | 0.08     | 37.3 ( $\sigma=13.8$ )        | 4.5 ( $\sigma=4.4$ )          | <b>2.9</b> ( $\sigma=2.3$ ) |

|                            |      |                               |     |     |
|----------------------------|------|-------------------------------|-----|-----|
| Nodal root emergence angle | 0.04 | <b>5.7</b> ( $\sigma=11.9$ )  | N/A | N/A |
|                            | 0.08 | <b>7.3</b> ( $\sigma=11.9$ )  | N/A | N/A |
| Nodal root midpoint angle  | 0.04 | <b>7.1</b> ( $\sigma=14.0$ )  | N/A | N/A |
|                            | 0.08 | <b>9.1</b> ( $\sigma=13.8$ )  | N/A | N/A |
| Nodal root tip angle       | 0.04 | <b>18.3</b> ( $\sigma=17.7$ ) | N/A | N/A |
|                            | 0.08 | <b>22.7</b> ( $\sigma=22.8$ ) | N/A | N/A |

591 Each entry gives the average error (and standard deviation  $s$ ) for a method across all simulated  
 592 models and across all noise levels up to  $e=0.04$  cm and 0.08 cm. For each trait, the method with  
 593 the lowest error is bold-faced.  
 594

595 **Table 3: Comparing TopoRoot to DynamicRoots and DynamicRoots+ for lateral root**  
 596 **traits.**  
 597

| Trait                               | $\leq e$ | TopoRoot (%)                   | DynamicRoots (%)         | DynamicRoots+ (%)        |
|-------------------------------------|----------|--------------------------------|--------------------------|--------------------------|
| 1st-order lateral root count        | 0.04     | <b>41.4</b> ( $\sigma=23.4$ )  | 75.6 ( $\sigma=11.3$ )   | 71.5 ( $\sigma=10.7$ )   |
|                                     | 0.08     | <b>49.0</b> ( $\sigma=41.5$ )  | 80.7 ( $\sigma=11.2$ )   | 71.9 ( $\sigma=10.3$ )   |
| 1st-order lateral root total length | 0.04     | <b>44.5</b> ( $\sigma=15.0$ )  | 71.9 ( $\sigma=13.9$ )   | 66.9 ( $\sigma=15.4$ )   |
|                                     | 0.08     | <b>47.0</b> ( $\sigma=15.9$ )  | 76.7 ( $\sigma=14.9$ )   | 67.4 ( $\sigma=14.9$ )   |
| 1st-order lateral root avg. length  | 0.04     | <b>20.4</b> ( $\sigma=15.0$ )  | 38.1 ( $\sigma=74.6$ )   | 26.5 ( $\sigma=54.0$ )   |
|                                     | 0.08     | <b>25.6</b> ( $\sigma=19.2$ )  | 53.2 ( $\sigma=98.2$ )   | 26.0 ( $\sigma=52.3$ )   |
| 1st-order lateral root thickness    | 0.04     | <b>355.0</b> ( $\sigma=85.8$ ) | 424.6 ( $\sigma=101.7$ ) | 439.2 ( $\sigma=104.2$ ) |
|                                     | 0.08     | <b>342.8</b> ( $\sigma=85.3$ ) | 427.7 ( $\sigma=112.0$ ) | 450.1 ( $\sigma=102.2$ ) |
| 1st-order lateral root              | 0.04     | <b>68.3</b> ( $\sigma=34.7$ )  | 152.9 ( $\sigma=301.1$ ) | 115.6 ( $\sigma=192.7$ ) |

|                                        |      |                               |                          |                               |
|----------------------------------------|------|-------------------------------|--------------------------|-------------------------------|
| number of children                     | 0.08 | <b>80.7</b> ( $\sigma=50.0$ ) | 180.9 ( $\sigma=319.7$ ) | 115.6 ( $\sigma=182.6$ )      |
| 1st-order lateral root tortuosity      | 0.04 | <b>4.6</b> ( $\sigma=3.2$ )   | 11.9 ( $\sigma=2.1$ )    | 12.1 ( $\sigma=1.8$ )         |
|                                        | 0.08 | <b>4.5</b> ( $\sigma=3.2$ )   | 10.2 ( $\sigma=3.0$ )    | 11.3 ( $\sigma=2.0$ )         |
| 1st-order lateral root emergence angle | 0.04 | <b>3.4</b> ( $\sigma=2.4$ )   | N/A                      | N/A                           |
|                                        | 0.08 | <b>3.0</b> ( $\sigma=2.2$ )   | N/A                      | N/A                           |
| 1st-order lateral root midpoint angle  | 0.04 | <b>4.1</b> ( $\sigma=2.7$ )   | N/A                      | N/A                           |
|                                        | 0.08 | <b>4.0</b> ( $\sigma=2.7$ )   | N/A                      | N/A                           |
| 1st-order lateral root tip angle       | 0.04 | <b>5.4</b> ( $\sigma=6.4$ )   | N/A                      | N/A                           |
|                                        | 0.08 | <b>5.9</b> ( $\sigma=7.3$ )   | N/A                      | N/A                           |
| Lateral root count                     | 0.04 | <b>22.2</b> ( $\sigma=19.5$ ) | 60.6 ( $\sigma=13.0$ )   | 58.0 ( $\sigma=14.8$ )        |
|                                        | 0.08 | <b>37.0</b> ( $\sigma=56.1$ ) | 66.8 ( $\sigma=12.4$ )   | 58.1 ( $\sigma=14.4$ )        |
| Total lateral root length              | 0.04 | <b>24.3</b> ( $\sigma=9.3$ )  | 52.3 ( $\sigma=19.6$ )   | 50.9 ( $\sigma=19.0$ )        |
|                                        | 0.08 | <b>24.4</b> ( $\sigma=11.4$ ) | 59.1 ( $\sigma=18.8$ )   | 56.0 ( $\sigma=17.8$ )        |
| Average lateral root length            | 0.04 | <b>20.2</b> ( $\sigma=14.8$ ) | 21.2 ( $\sigma=22.4$ )   | 22.0 ( $\sigma=21.6$ )        |
|                                        | 0.08 | 25.9 ( $\sigma=19.0$ )        | 21.4 ( $\sigma=22.9$ )   | <b>20.6</b> ( $\sigma=20.2$ ) |

598 Each entry gives the average error (and standard deviation  $s$ ) for a method across all simulated  
 599 models and across all noise levels up to  $e=0.04$  cm and 0.08 cm. For each trait, the method with  
 600 the lowest error is bold-faced.

601  
 602 **Table 4: Comparing TopoRoot to DynamicRoots, DynamicRoots+, GiaRoots, and**  
 603 **GiaRoots+ for global traits.**

| Trait            | $\leq e$ | TopoRoot (%)                  | DynamicRoots (%)       | DynamicRoots+ (%)      | GiARoots (%)           | GiARoots+ (%)          |
|------------------|----------|-------------------------------|------------------------|------------------------|------------------------|------------------------|
| Total root count | 0.04     | <b>21.5</b> ( $\sigma=18.4$ ) | 53.7 ( $\sigma=11.1$ ) | 49.3 ( $\sigma=11.3$ ) | 57.9 ( $\sigma=13.7$ ) | 56.8 ( $\sigma=13.7$ ) |

|                     |      |                               |                              |                             |                           |                        |
|---------------------|------|-------------------------------|------------------------------|-----------------------------|---------------------------|------------------------|
|                     | 0.08 | <b>35.4</b> ( $\sigma=51.8$ ) | 60.8 ( $\sigma=12.7$ )       | 49.7 ( $\sigma=11.3$ )      | 45.7<br>( $\sigma=21.1$ ) | 57.5 ( $\sigma=13.2$ ) |
| Average root length | 0.04 | 18.4 ( $\sigma=13.5$ )        | 9.1 ( $\sigma=11.8$ )        | <b>9.7</b> ( $\sigma=9.8$ ) | 42.6<br>( $\sigma=33.5$ ) | 50.2 ( $\sigma=35.3$ ) |
|                     | 0.08 | 24.7( $\sigma=18.8$ )         | <b>9.9</b> ( $\sigma=12.5$ ) | 13.3 ( $\sigma=12.2$ )      | 40.8<br>( $\sigma=27.4$ ) | 55.6 ( $\sigma=34.2$ ) |
| Total length        | 0.04 | <b>25.0</b> ( $\sigma=8.5$ )  | 52.2 ( $\sigma=13.9$ )       | 48.7 ( $\sigma=13.1$ )      | 46.0<br>( $\sigma=12.1$ ) | 40.1 ( $\sigma=12.1$ ) |
|                     | 0.08 | <b>25.4</b> ( $\sigma=9.7$ )  | 59.6 ( $\sigma=14.5$ )       | 52.8 ( $\sigma=12.4$ )      | 45.7<br>( $\sigma=19.6$ ) | 38.2 ( $\sigma=13.1$ ) |

604 Each entry gives the average error (and standard deviation  $s$ ) for a method across all simulated  
605 models and across all noise levels up to  $e=0.04$  cm and 0.08 cm. For each trait, the method with  
606 the lowest error is bold-faced.

## 607 Discussion

608 A gap exists in the phenotypic measure of root system architecture between fine-grained  
609 analyses that can be conducted on entire seedling root systems in laboratory settings, and much  
610 coarser global analyses available to field researchers. Since root systems are an emergent  
611 property of their many hundreds, thousands, or tens of thousands of constituent roots, this gap is  
612 a major hindrance to a comprehensive understanding of root system development, environmental  
613 interaction, and the genetics that influence these processes. In previous work, we showed that  
614 when global 3D analysis of field excavated maize root crowns was compared to 3D seedling  
615 analysis in gellan gum, genetically encoded differences were consistent despite major differences  
616 in developmental stage and the growth environment [17]. Whereas DynamicRoots was  
617 previously developed for fine scale measurements of 3D seedling root systems containing dozens  
618 to hundreds of roots, no similar tool existed for more complex mature root crowns, containing  
619 hundreds to thousands of roots. The orders of magnitude of increased complexity motivated  
620 unique solutions using both state-of-the-art techniques in computer graphics [38, 36, 37] and

621 novel algorithms which eventually led to the development of TopoRoot. While we consider this  
622 first version as the foundation of several future planned advancements, discussed below, we were  
623 able to present here unprecedented fine-grained analysis of complex 3D root systems (on average  
624 943 total roots [maximum of 2514]), 78 nodal roots (maximum of 126), 865 lateral roots (all  
625 classes combined; maximum of 2414) for the excavated maize roots, as computed by TopoRoot)  
626 that facilitates “apples to apples” comparisons with existing seedling phenotyping pipelines.

### 627 Error analysis

628 The steps of our pipeline which are most prone to errors are topological simplification and  
629 skeletonization. The amount and quality of the topological repairs depends on the choices of the  
630 iso-values  $k$ ,  $s$ , and  $n$ . If  $k$  and  $n$  are too close to  $s$ , then very little topological simplification will  
631 occur. On the other hand, if  $k$  and  $n$  are too far away from  $s$ , then such an aggressive setting may  
632 result in some topological features being removed in a geometrically suboptimal fashion. This is  
633 because we use a setting of [38] which uses the image intensity as guidance to determine where  
634 contents are added and removed from the iso-surface  $s$ , but these changes may not be smooth if  
635 the image values are not reliable. For example, cycles may be cut in the middle of branches,  
636 resulting in improper tracing of branches and potential double counting of the same root.

637 Another step of our pipeline which is prone to errors is the cycle breaking portion of  
638 skeletonization. Decisions on where to break cycles rely on local angle continuity information  
639 near junctions, as well as the distance from the stem. However, if a root continues across many  
640 junctions where cycles pass through, then the root may accidentally be cut off early at one of  
641 these junctions. Our pipeline is sensitive to the amount of soil remaining in the sample, because  
642 soil often has a similar or higher intensity as the roots. If a large clump of soil is stuck onto the  
643 root, it may result in a thick region which is mistakenly identified as part of the stem. This

644 problem can be avoided by thorough cleaning of samples prior to scanning, and by basic image  
645 thresholding prior to TopoRoot analysis. The final contrast will affect the ideal choices for  $k$  and  
646  $n$  with respect to  $s$ ; the greater the contrast, the smaller the gap between  $k$  and  $n$  need to be to  
647 incur the same amount of topological simplification.

648 The quality of the topological repairs may be improved by considering not only the image  
649 intensity when computing additions and removals of contents, but also incorporating geometric  
650 criteria such as the tubularity of a region to identify it as part of a root. This will allow for a  
651 greater amount of topological simplification without sacrificing geometric optimality. The  
652 suboptimal local decisions of cycle-breaking may be potentially improved by grouping cutting  
653 decisions together to produce a collective score. These groups can gradually be built from the  
654 bottom-up to produce a more globally optimal solution.

#### 655 Running time

656 On average, TopoRoot completes in 7 minutes and 13 seconds for each sample in the CT scan  
657 dataset (downsampled by a factor of 4 to the resolution of 369 x 369 x 465). Since this is much  
658 shorter than the time spent imaging and reconstructing one sample, TopoRoot is well suited for  
659 high-throughput analysis. The computation time is dominated by the first two steps, topological  
660 simplification (3 minutes and 6 seconds) and skeletonization (3 minutes and 44 seconds). The  
661 time complexity of both these steps may increase quickly with the image resolution. For  
662 example, running TopoRoot on the original CT volumes downsampled by a factor of 2 (instead  
663 of 4 as used in our validation), which results in volumes of resolution 737 x 737 x 931, would  
664 take 63 minutes and 39 seconds, with 32 minutes and 25 seconds spent on topological  
665 simplification and 29 minutes and 9 seconds on skeletonization. On the other hand, we have not

666 observed a notable improvement in the accuracy of the nodal root count for this data set by  
667 reducing the downsampling factor from 4 to 2.

668 Extensions

669

670

671 **Fig. 14**

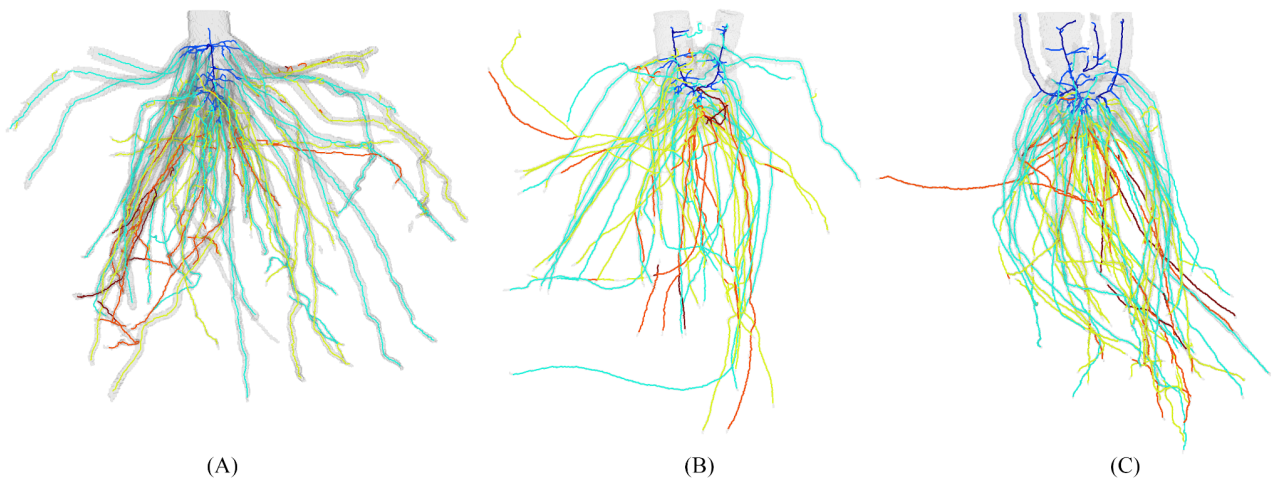

672

673 Hierarchies of sorghum roots computed by TopoRoot. The examples have (A) one tiller (B) two  
674 tillers and (C) four tillers. Hierarchy levels 0, 1, 2, 3 and 4 are colored dark blue, light blue,  
675 green, orange, and red.

676 In addition to the per-level traits reported in this work, the hierarchy obtained by TopoRoots  
677 potentially enables computation of other fine-grained traits. For example, we are currently  
678 exploring the use of the hierarchy for computing whorls and the soil plane, which would in turn  
679 enable computation of traits such as inter-whorl distances, per-whorl measurements, and the  
680 numbers of nodal roots above and below the soil. Preliminary experiments show promising  
681 results of whorl detection by clustering the nodal roots along the stem. The soil plane can be



682 potentially identified where a large cluster of 1st-order lateral roots appear along the direction of  
683 the stem.

684 While TopoRoot is designed for and validated on X-ray CT scans of excavated maize root  
685 crowns, the tool can be potentially adapted to other types of root systems and imaging  
686 modalities. For root crowns with multiple tillers (e.g., sorghum), we offer a mode of TopoRoot  
687 which extends the stem-detection heuristic (during the skeletonization step) by producing a stem  
688 path within each region of the skeleton above a given thickness threshold. Preliminary visual  
689 experiments show that TopoRoot's multiple-tiller mode produces plausible hierarchies at a  
690 quality similar to that seen in the single-tiller mode (Figure 14). Further expanding the stem-  
691 detection heuristic to identify the primary root would make the pipeline applicable to taprooted  
692 systems as well. TopoRoot should work equally well for fine-grained analysis of 3D root system  
693 architecture reconstructions derived from in situ imaging methods such as X-ray CT, MRI, and  
694 optical imaging, provided they are first segmented from background (primarily soil and pot).  
695 Segmentation can be done using a variety of methods such as region-growing [1], tracking  
696 tubular features [26; 22], deep learning [29, 30], and semi-automatic annotation [3, 6]. Note that  
697 some of these methods produce a binary volume (e.g., region-growing) whereas others produce a  
698 probability density field (e.g., deep learning). Since TopoRoot requires a gray-scale intensity  
699 volume with three thresholds (shape, kernel and neighborhood), a binary segmentation will first  
700 need to be converted into a Euclidean distance field.

701 Software availability

702 TopoRoot is available for free at: <https://github.com/danzeng8/TopoRoot>

703 Included in the page are instructions to run the software, and details on the formats of the input  
704 and output. Currently, the accepted inputs are either image slices (suffixed with .png) or .raw  
705 files, with a .dat accompanying the .raw file to specify the dimensions. TopoRoot is currently  
706 configured to build and run on Windows 10 machines, and has not been tested on other  
707 platforms. We plan on releasing a Linux build of TopoRoot in the future. A graphical user  
708 interface is also available on the page for visualizing the output hierarchy.

## 709 Conclusions

710 We introduced TopoRoot, a high-throughput method for computing the root hierarchy and fine-  
711 grained root traits from a 3D image. TopoRoot specifically addresses topological errors, which  
712 are common in 3D imaging and segmentation and are barriers for obtaining accurate root  
713 hierarchies. Our method combines state-of-the-art methods developed in computer graphics with  
714 customized heuristics to compute a wide variety of traits at each level of the root hierarchy.  
715 When tested on both 3D scans of excavated maize root crowns and simulated root systems with  
716 artificially added noise, TopoRoot exhibits higher accuracy than existing tools (DynamicRoots  
717 and GiaRoots) in both coarse-grained and fine-grained traits. Furthermore, the efficiency and  
718 automation of TopoRoot makes it ideal for a high-throughput analysis pipeline, and the results  
719 are readily compatible with the Root System Markup Language (RSML;[13]), and major plant  
720 structural-functional modelling frameworks such as CRootBox [25] and OpenSimRoot [24].

## 721 List of Abbreviations

722 **RSA:** Root system architecture

723 **CT:** Computed Tomography

724 **Declarations**

725 Ethics approval and consent to participate

726 Not applicable

727 Consent for publication

728 Not applicable

729 Availability of data and materials

730 The datasets generated and analysed during the current study are available in the TopoRoot

731 Github repository: <https://github.com/danzeng8/TopoRoot>

732 Competing interests

733 The authors declare that they have no competing interests.

734 Funding

735 This material is based upon work supported by the National Science Foundation under award

736 numbers DBI-1759836, DBI-1759807, DBI-1759796, EF-1971728, CCF-1907612, CCF-

737 2106672, and IOS-1638507. DZ is funded in part by an Imaging Sciences Pathway Fellowship

738 from Washington University in St. Louis.

739 Authors' Contributions

740 DZ was the primary developer and coder of TopoRoot. DZ wrote the manuscript with  
741 contributions from TJ, CNT, NJ, ML, EC, DL, YJ, and HS. DZ, TJ, and CNT designed the study  
742 and experiments. DZ performed experiments and analyzed the data. YJ developed the graphical  
743 user interface with contributions from DZ. All authors have read and approved the final  
744 manuscript.

#### 745 Acknowledgements

746 We would like to thank Tiffany Hopkins, Dhineshkumar Thiruppathi, Elisa Morales, Mitchell  
747 Sellers, Shayla Gunn, August (Gus) Thies, Keith Duncan, and Tim Parker (Donald Danforth  
748 Plant Science Center) for the planting, harvesting, imaging, and collection of hand measurements  
749 on maize roots, and Gustavo Gratacos (Washington University) and Yajie Yan (Facebook) for  
750 their valuable insights on the cycle breaking algorithm and geometric skeleton computation. We  
751 thank Mon-Ray Shao (Donald Danforth Plant Science Center) for the discussion on future  
752 applications to sorghum and other species.

#### 753 Authors' information

##### 754 Affiliations

755 **Department of Computer Science and Engineering, Washington University in St. Louis, St.**  
756 **Louis, USA**

757 Dan Zeng, Tao Ju, Yiwen Ju

758 **Donald Danforth Plant Science Center, St. Louis, USA**

759 Christopher Topp, Mao Li, Ni Jiang

760 **Department of Computer Science, Saint Louis University, St. Louis, USA**

761 Erin Chambers, David Letscher, Hannah Schreiber

762 References

- 763 1. Blaser S, Schluter S, Vetterlein D. How much is too much? - Influence of X-ray dose  
764 on root growth of faba bean (*Vicia faba*) and barley (*Hordeum vulgare*). PLoS ONE.  
765 2018;13(3).
- 766 2. Dorlodot SD, Forster B, Pages L, Price A, Tuberosa R, Draye X. Root system  
767 architecture: opportunities and constraints for genetic improvement of crops. Trends in  
768 plant science. 2007;12(10):474-81.
- 769 3. Flavel RJ, Guppy CN, Rabbi SMR, Young IM (2017) An image processing and analysis  
770 tool for identifying and analysing complex plant root systems in 3D soil using non-  
771 destructive analysis: Root1. PLoS ONE 12(5).
- 772 4. Galkovskyi T, Mileyko Y, Bucksch A, Moore B, Symonova O, Price CA, et al. GiA  
773 Roots: software for the high throughput analysis of plant root system architecture.  
774 BMC Plant Biology. 2012;69:237-43.
- 775 5. Gao W, Schluter S, Blaser SRGA, Shen J, Vetterlein D. A shape-based method for  
776 automatic and rapid segmentation of roots in soil from X-ray computed tomography  
777 images. Plant and Soil. 2019;441:643-655.
- 778 6. Gerth S, Clauben J, Eggert A, Wörlein N, Waininger M, Wittenberg T, Uhlmann N.  
779 Semiautomated 3D Root Segmentation and Evaluation Based on X-Ray CT Imagery.  
780 Plant Phenomics. 2021.

- 781 7. Gonzalez D, Postma J, Wissuwa M. Cost-Benefit Analysis of the Upland-Rice Root  
782 Architecture in Relation to Phosphate: 3D Simulations Highlight the Importance of S-  
783 Type Lateral Roots for Reducing the Pay-Off Time. *Frontiers in Plant Science*.  
784 2021;12(359).
- 785 8. Koevoets IT, Venema JH, Elzenga JTM, Testerink C. Roots withstanding their  
786 environment:  
787 exploiting root system architecture responses to abiotic stress to improve crop  
788 tolerance. *Trends in plant science*. 2016;7:1335.
- 789 9. Li M, Shao MR, Zeng D, Ju T, Kellogg EA, Topp CN. Comprehensive 3D phenotyping reveals  
790 continuous morphological variation across genetically diverse sorghum inflorescences. *New*  
791 *Phytologist*. 2020;226:1873-85.
- 792 10. Lynch J. Root architecture and plant productivity. *Plant physiology*. 1995; 109(1):7-13.
- 793 11. Lynch J. Rightsizing root phenotypes for drought resistance. *Journal of Experimental*  
794 *Botany*. 2018;69(13):3279-3292.
- 795 12. Liu S., Barrow CS, Hanlon, M, Lynch JP, Buksch A. DIRT/3D: 3D root phenotyping for  
796 field-grown maize (*Zea mays*). *Plant Physiology*. 2021.
- 797 13. Lobet, G, Pound, MP, Diener, J, Pradal, C, Draye, X, Godin, C, Javaux, M, Leitner, D,  
798 Meunier, F, Nacry, P, Pridmore, TP, and Schnepf, A. (2015). Root system markup  
799 language: toward a unified root architecture description language. *Plant Physiol*.  
800 167:617–627.
- 801 14. Mairhofer S, Zappala S, Tracy SR, Sturrock C, Bennett M, Mooney SJ, et al.  
802 RooTrak: Automated Recovery of Three-Dimensional Plant Root Architecture in Soil  
803 from X-Ray Microcomputed Tomography Images Using Visual Tracking. *Plant*  
804 *Physiology*. 2012;158(2):561-9.

- 805 15. Mooney SJ, Pridmore TP, Helliwell J. Developing X-ray Computed Tomography to non-  
806 invasively image 3-D root systems architecture in soil. *Plant Soil*. 2012;352:1-22.
- 807 16. Jenkins, MT. Heritable Characters of Maize XXXIV—Rootless. *J. Hered.* 1930.21:79–  
808 80.
- 809 17. Jiang N, Floro E, Bray AL, Laws B, Duncan KE, Topp CN, Three-Dimensional Time-  
810 Lapse Analysis Reveals Multiscale Relationships in Maize Root Systems with  
811 Contrasting Architectures. *The Plant Cell*. 2019 Aug;31(8):1708–1722.
- 812 18. Oswald SE, Totzke C, Haber-Pohlmeier S, Pohlmeier A, Kaestner AP, Lehmann E.  
813 Combining Neutron and Magnetic Resonance Imaging to Study the Interaction of Plant  
814 Roots and Soil. *Physics Procedia*. 2015;69:237-43.
- 815 19. Paez-Garcia A, Motes CM, Scheible WR, Chen R, Blancaflor EB, Monteros MJ. Root  
816 Traits and Phenotyping Strategies for Plant Improvement. *Plants*. 2015;4(2):334-55.
- 817 20. Perret JS, Al-Belushi ME, Deadman M. Non-destructive visualization and quantification  
818 of roots using computed tomography. *Soil Biology and Biochemistry*. 2007;39(2):391-9.
- 819 21. Pfeifer J, Kirchgessner N, Colombi T, Walter A. Rapid phenotyping of crop root systems  
820 in undisturbed old soils using X-ray computed tomography. *Plant Methods*. 2015;11(41).
- 821 22. Phalempin, M., Lippold, E., Vetterlein, D., and Schlüter, S. (2021). An improved method  
822 for the segmentation of roots from X-ray computed tomography 3D images: Routine v.2.  
823 *Plant Methods*. 17(39).
- 824 23. Piñeros MA, Larson BG, Shaff JE, Schneider DJ, Falcão AX, Yuan L, Clark RT, Craft  
825 EJ, Davis TW, Pradier PL, Shaw NM, Assaranurak I, McCouch SR, Sturrock C, Bennett  
826 M, Kochian LV. Evolving technologies for growing, imaging and analyzing 3D root  
827 system architecture of crop plants. *J Integr Plant Biol*. 2016 Mar;58(3):230-41.



- 828 24. Postma JA, Kuppe C, Owen MR, Mellor N, Griffiths M, Bennett MJ, Lynch JP, Watt M.  
829 OpenSimRoot: widening the scope and application of root architectural models. *New*  
830 *Phytologist*. 2017;215:1274–1286.
- 831 25. Schnepf, A, Leitner, D, Landl, M, Lobet, G, Mai, TH, Morandage, S, Sheng, C, Zörner,  
832 M, Vanderborcht, J, and Vereecken, H CRootBox: a structural-functional modelling  
833 framework for root systems. *Ann. Bot.* 2018.
- 834 26. Schulz, H, Postma JA, van Dusschoten D, Scharr H, Behnke S. 3D reconstruction of  
835 plant roots from MRI images. In *Proc. Internat. Conf. Comput. Vision Theory and*  
836 *Applications (VISAPP) 2012*.
- 837 27. Schulz H, Postma JA, van Dusschoten D, Scharr H, Behnke S. Plant Root System  
838 Analysis from MRI Images. In: Csurka G, Kraus M, Laramée RS, Richard P, Braz J,  
839 editors. *Computer Vision, Imaging and Computer Graphics. Theory and Application*.  
840 Berlin, Heidelberg: Springer Berlin Heidelberg; 2013;411-25.
- 841 28. Shao MR, Jiang N, Li M, Howard A, Lehner K, Mullen JL, Gunn SL, McKay JK, Topp  
842 CN. Complementary Phenotyping of Maize Root Architecture by Root Pulling Force and  
843 X-Ray Computed Tomography. *bioRxiv* 2021. doi: 10.1101/2021.03.03.433776
- 844 29. Smith, A.G., Petersen, J., Selvan, R. et al. Segmentation of roots in soil with U-Net. *Plant*  
845 *Methods*. 2020;16(13).
- 846 30. Soltaninejad, M, Sturrock, CJ, Griffiths, M, Pridmore, TP, and Pound, MP. Three  
847 Dimensional Root CT Segmentation using Multi-Resolution Encoder-Decoder Networks.  
848 *IEEE Trans. Image Process*. 2020.

- 849 31. Strock CF, Burr ridge J, Massas ASF, Beaver J, Beebe S, Camilo SA, et al. Seedling root  
850 architecture and its relationship with seed yield across diverse environments in *Phaseolus*  
851 *vulgaris*. *Field Crops Research*. 2019;237:53-64.
- 852 32. Symonova O, Topp CN, Edelsbrunner H. DynamicRoots: A Software Platform for the  
853 Reconstruction and Analysis of Growing Plant Roots. *PLoS ONE*. 2015;10(6).
- 854 33. Topp, CN et al. 2013. 3D phenotyping and quantitative trait locus mapping identify core  
855 regions of the rice genome controlling root architecture. *Proc. Natl. Acad. Sci. U. S. A.*  
856 110:E1695–E1704.
- 857 34. Trachsel, S, Kaeppeler, SM, Brown, KM, Lynch JP. Shovelomics: high throughput  
858 phenotyping of maize (*Zea mays* L.) root architecture in the field. *Plant Soil*.  
859 2011;341;75–87.
- 860 35. Xu J, Barbič J. Signed Distance Fields for Polygon Soup Meshes. In *Proceedings of*  
861 *Graphics Interface 2014*.
- 862 36. Yan Y, Sykes K, Chambers E, Letscher D, Ju T. Erosion Thickness on Medial Axes of  
863 3D Shapes. *ACM Trans Graph*. 2016; 35(4).
- 864 37. Yan Y, Letscher D, Ju T. Voxel Cores: Efficient, Robust, and Provably Good  
865 Approximation of 3D Medial Axes. *ACM Trans Graph*. 2018 Jul;37(4).
- 866 38. Zeng D, Chambers E, Letscher D, Ju T. To cut or to fill: a global optimization approach  
867 to topological simplification. *ACM transactions on graphics*; 39(6).
- 868 39. Zheng Y, Gu S, Edelsbrunner H, Tomasi C, Benfey P. Detailed reconstruction of 3D  
869 plant root shape. In *Proc. 13th Internat. Conf. Comput. Vision 2011*;2026–2033.

870 Supplementary Information

871 **Supplementary Table 1: TopoRoot's computed traits**

| <b>Groups</b>    | <b>Trait</b>                      | <b>Description</b>                                                                                                                                   |
|------------------|-----------------------------------|------------------------------------------------------------------------------------------------------------------------------------------------------|
| Global traits    | Total length                      | Sum of the lengths of stem, nodal roots, and lateral roots.                                                                                          |
|                  | Number of roots                   | Total number of roots across all hierarchy levels.                                                                                                   |
|                  | Average length                    | Total length divided by number of roots.                                                                                                             |
| Stem traits      | Average stem thickness            | Average thickness of the vertices along the stem path.                                                                                               |
|                  | Stem length                       | Length of the stem path.                                                                                                                             |
| Per-level traits | Level $n$ root count              | The number of level $n$ roots.                                                                                                                       |
|                  | Total level $n$ root length       | Sum of the lengths of level $n$ roots. The length is the skeleton distance from the beginning of the root to its tip.                                |
|                  | Average level $n$ root length     | Total level $n$ root length divided by level $n$ root count.                                                                                         |
|                  | Level $n$ root tortuosity         | Length of a root (skeleton distance) divided by the Euclidean distance from the beginning to the tip, averaged across all level $n$ roots.           |
|                  | Level $n$ root thickness          | Thickness associated with the skeleton vertices in the root, averaged across all level $n$ roots.                                                    |
|                  | Number of level $n$ root children | Number of level 2 roots divided by number of level 1 roots.                                                                                          |
|                  | Level $n$ root tip angle          | Angle between the stem direction and the vector from the beginning to the tip of a root, averaged across all level $n$ roots.                        |
|                  | Level $n$ root emergence angle    | Angle between the stem direction and the vector from the beginning to 30 vertices along the skeleton of a root, averaged across all level $n$ roots. |

|                                |                               |                                                                                                                                                     |
|--------------------------------|-------------------------------|-----------------------------------------------------------------------------------------------------------------------------------------------------|
|                                | Level $n$ root midpoint angle | Angle between the stem direction and the vector from the beginning of a root to the halfway point of the root, averaged across all level $n$ roots. |
| Aggregated lateral root traits | Total lateral length          | Sum of the lengths of lateral roots whose hierarchy level is greater than or equal to 2.                                                            |
|                                | Number of lateral roots       | Number of lateral roots whose hierarchy level is greater than or equal to 2.                                                                        |
|                                | Average lateral root length   | Average length of lateral roots whose hierarchy level is greater than or equal to 2.                                                                |

872 **Supplementary Fig. S1**

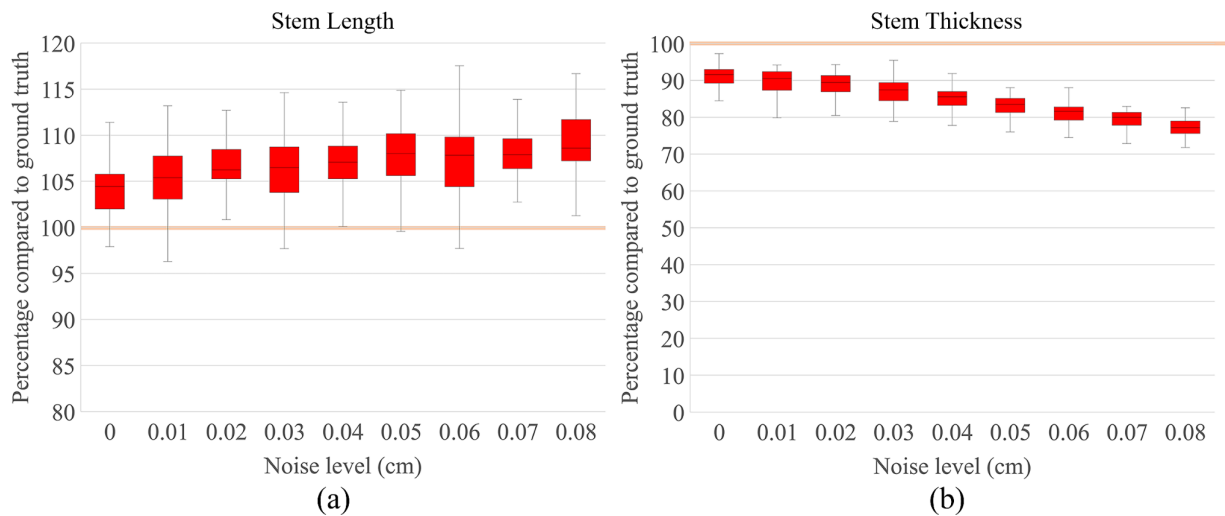

873 (a) (b)  
 874 Evaluating the accuracy of computing stem traits by TopoRoot. The tan line represents the  
 875 ground truth, and the result of TopoRoot is computed as a percentage of the ground truth.  
 876

877

878

879

880

881

882

883

884

885

886

887 **Supplementary Fig. S2**

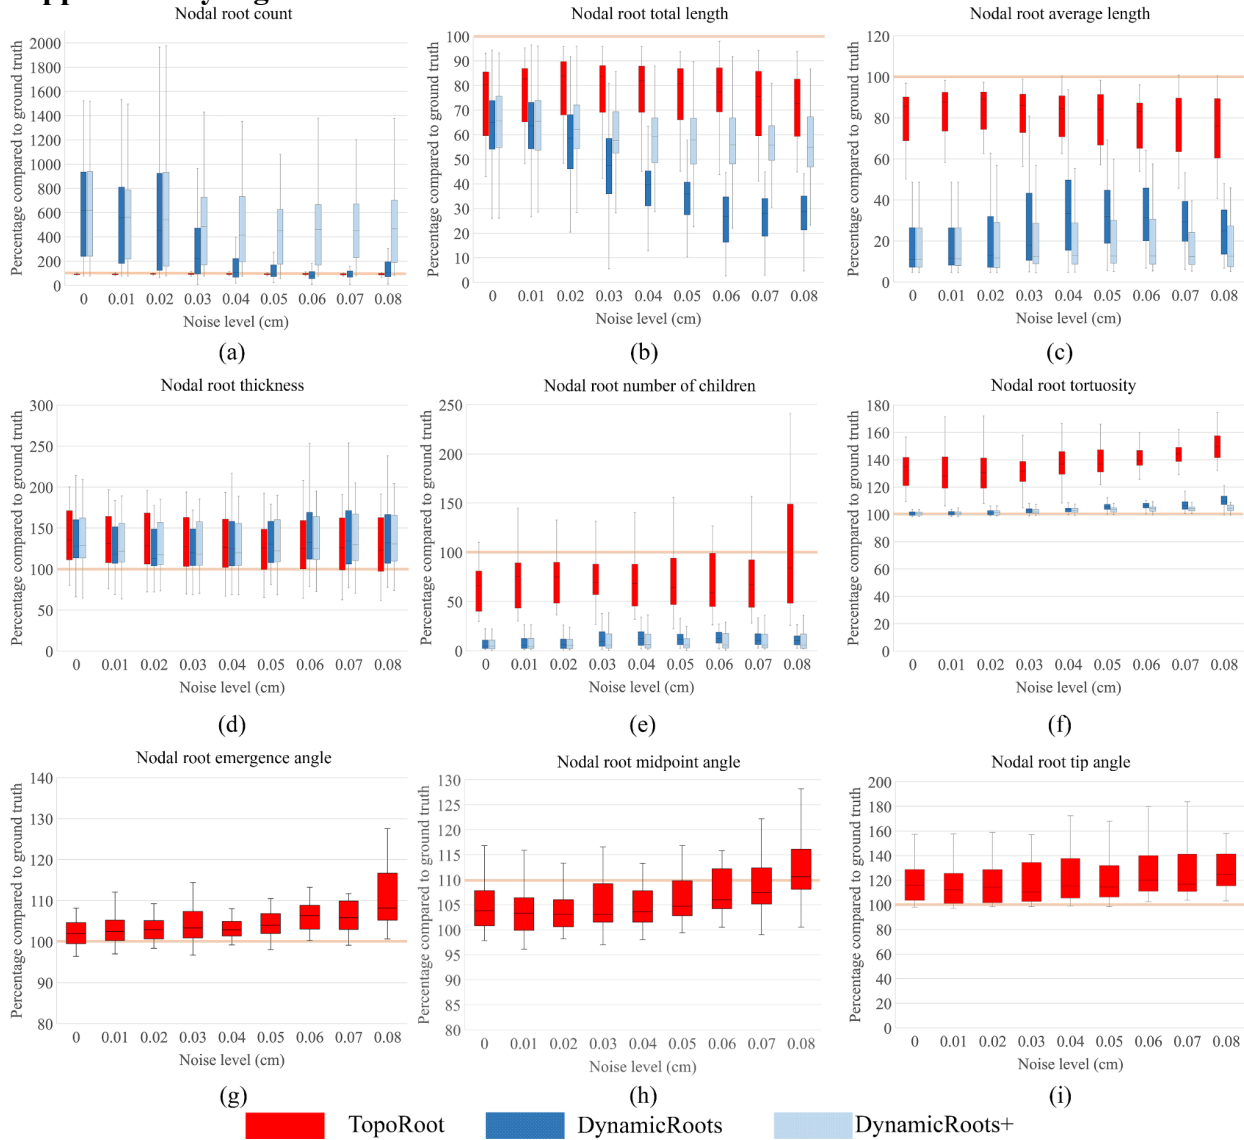

888

889 Comparing the accuracy of computing nodal root traits between TopoRoot, DynamicRoots, and  
890 DynamicRoots+ across 55 models. The tan line represents the ground truth, and the results of all  
891 methods are computed as a percentage of the ground truth.

892

893

894

895  
896  
897  
898  
899  
900  
901  
902  
903

**Supplementary Fig. S3**

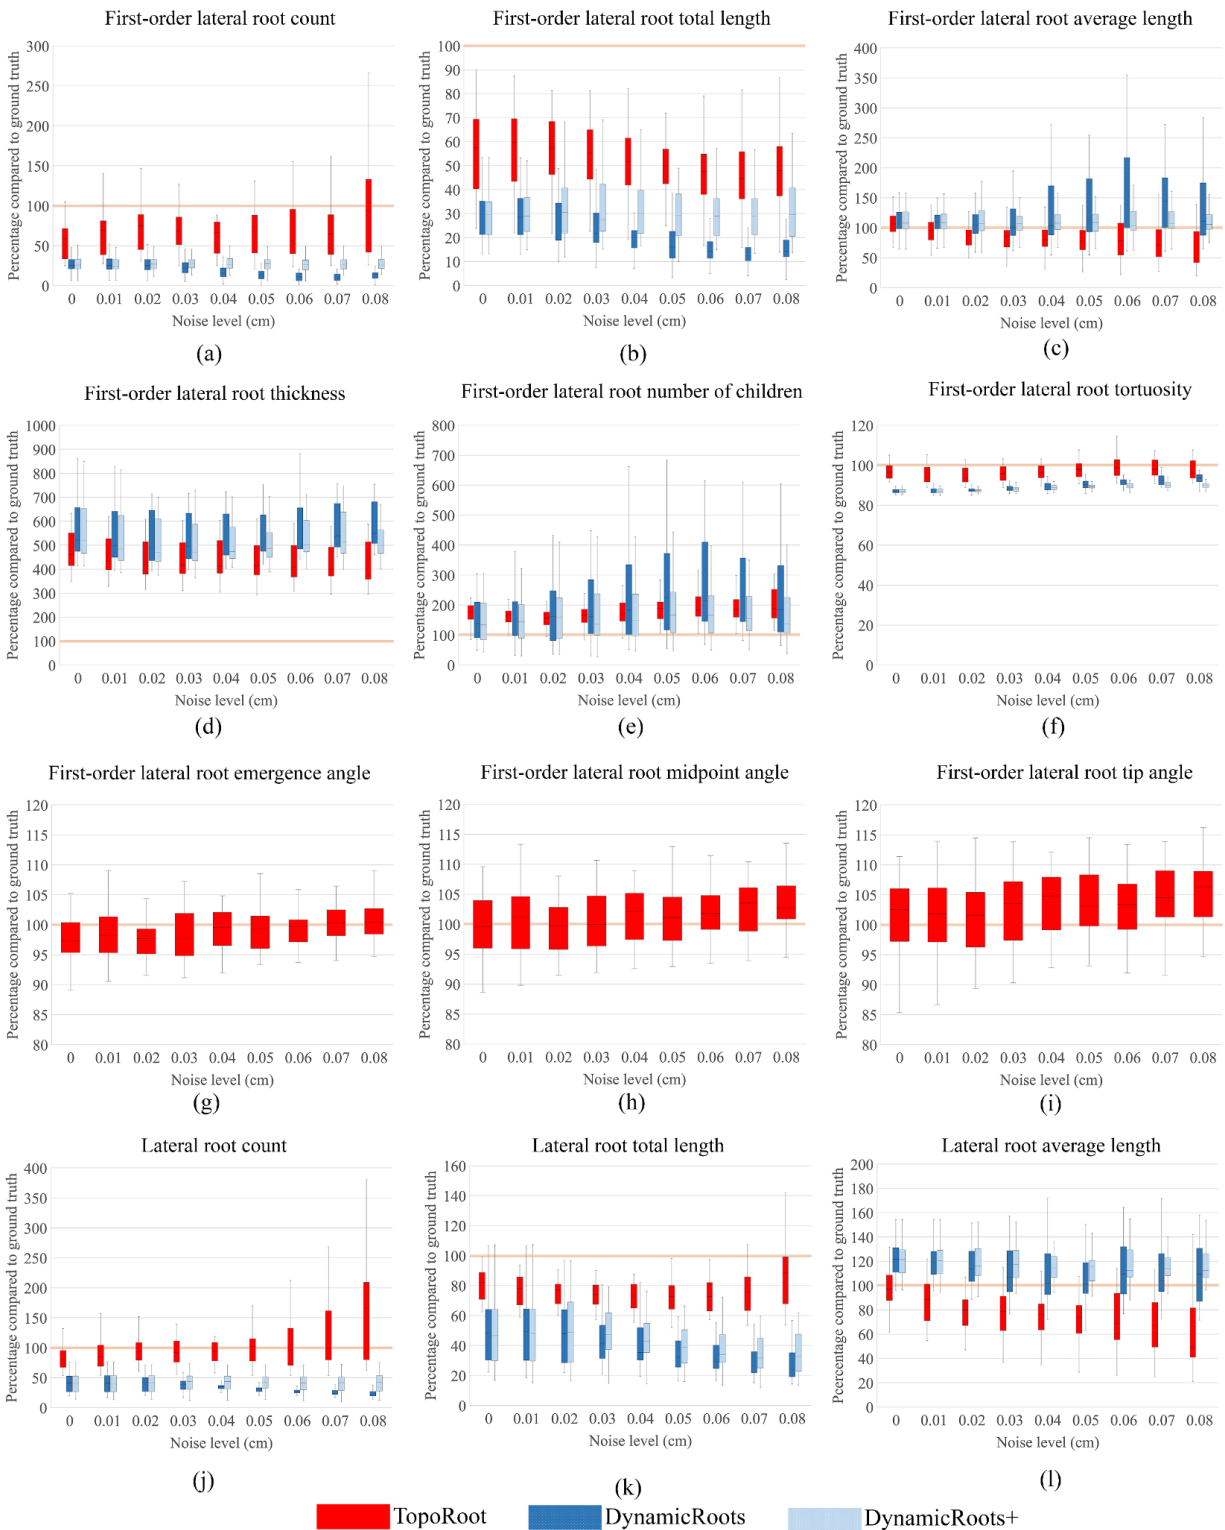

904  
905  
906  
907  
908  
909

Comparing the accuracy of computing lateral root traits between TopoRoot, DynamicRoots, and DynamicRoots+ across 55 models. The tan line represents the ground truth, and the results of all methods are computed as a percentage of the ground truth.

Supplementary Fig. S4



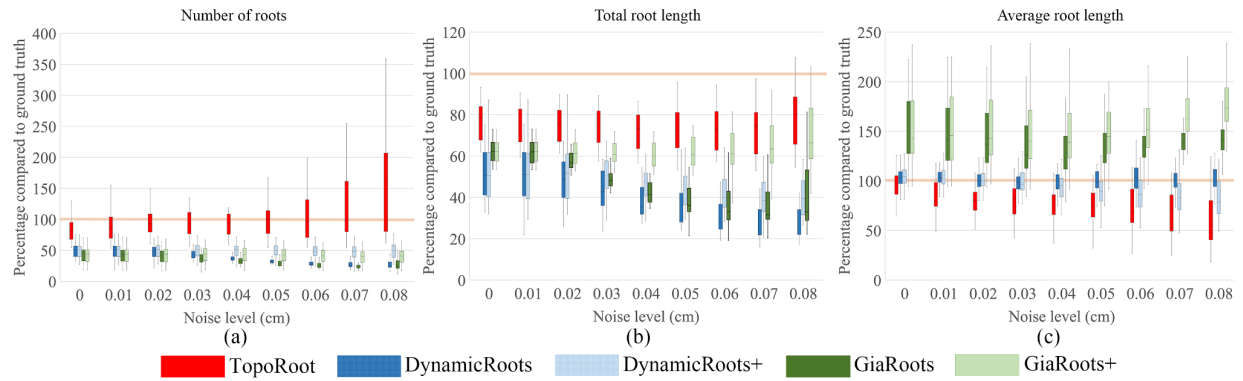

910  
911 Comparing the accuracy of computing global traits between TopoRoot, DynamicRoots,  
912 DynamicRoots+, GiaRoots, and GiaRoots+ across 55 models. The tan line represents the ground  
913 truth, and the results of all methods are computed as a percentage of the ground truth.

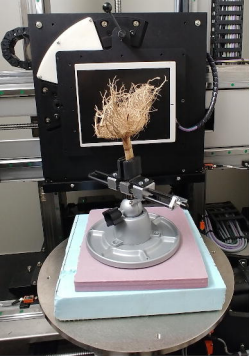

(A)

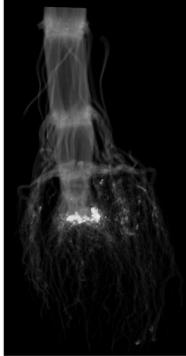

(B)

No Noise ( $e = 0$  cm)

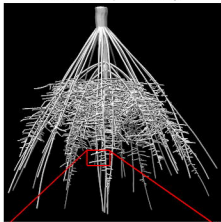

$e = 0.04$  cm

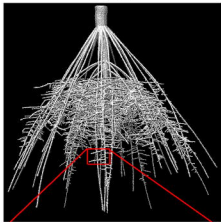

$e = 0.08$  cm

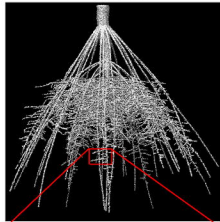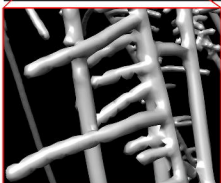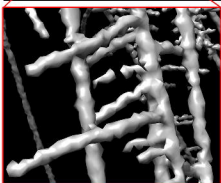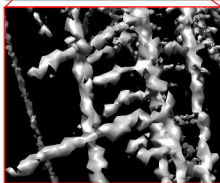

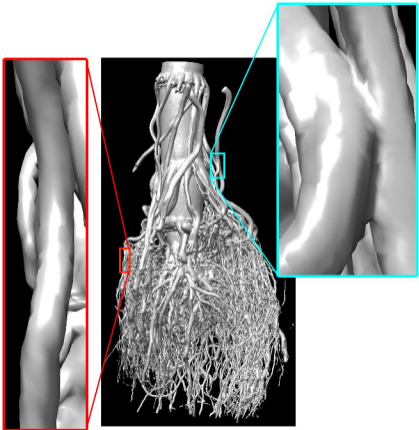

Neighborhood ( $n$ )

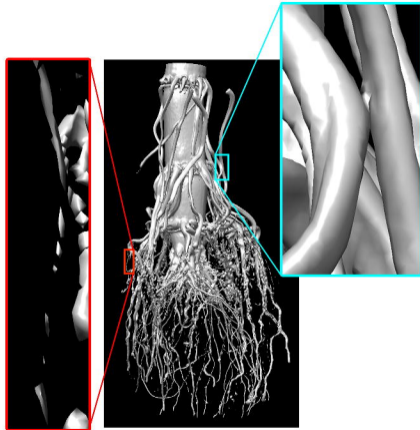

Shape ( $s$ )

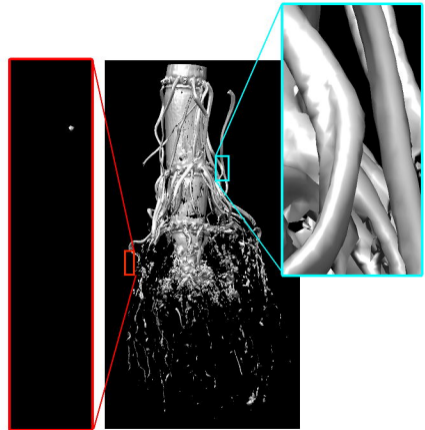

Kernel ( $k$ )

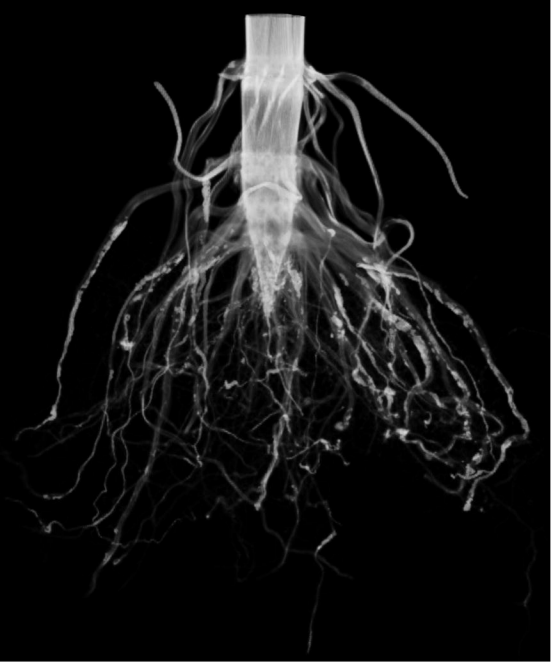

Input: 3D Grayscale Image

(A)

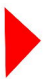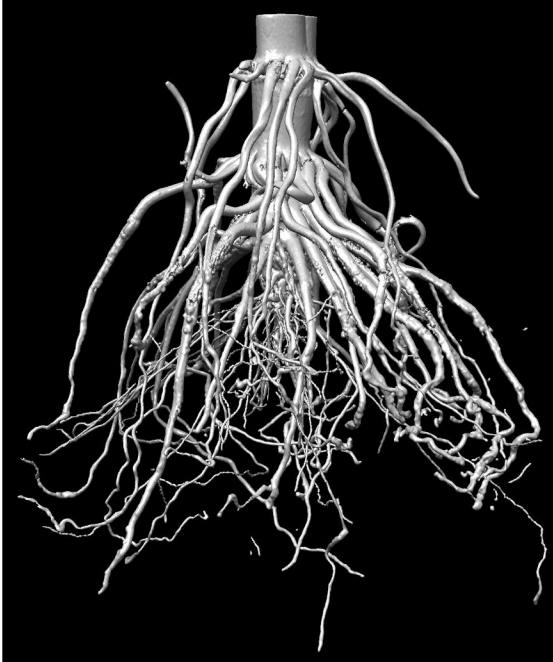

Topologically simplified  
iso-surface

(B)

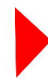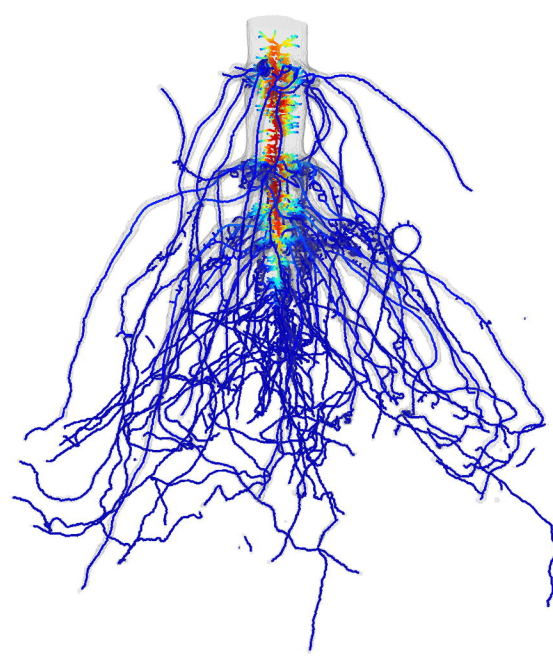

Skeleton representing  
branching structure

(C)

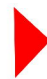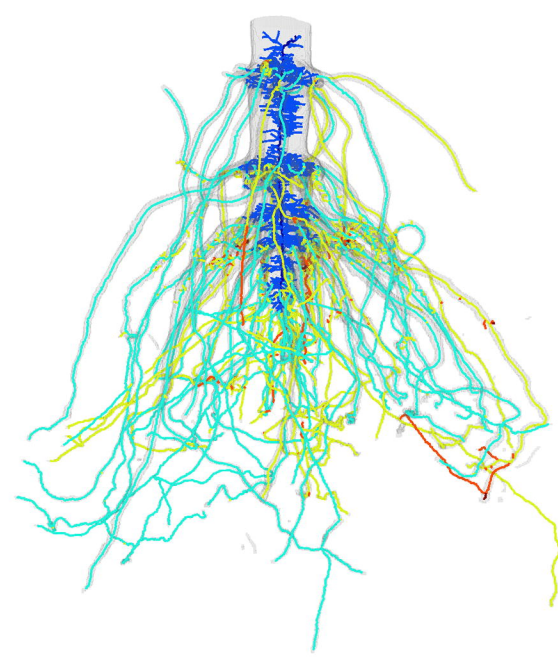

Hierarchy

(D)

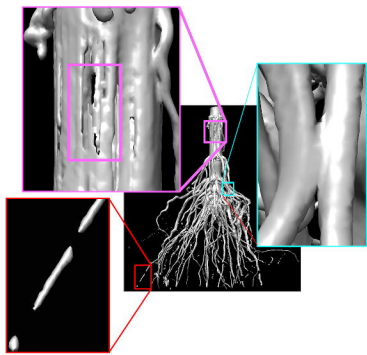

(A)

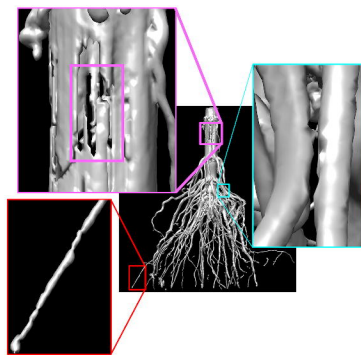

(B)

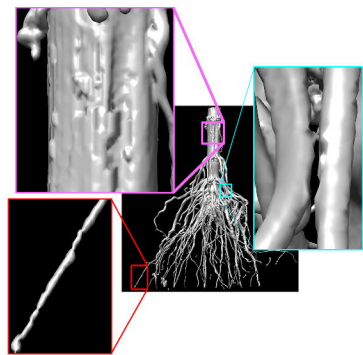

(C)

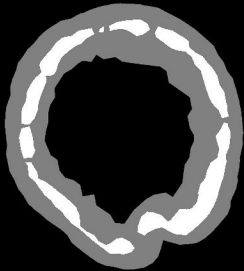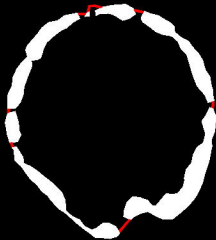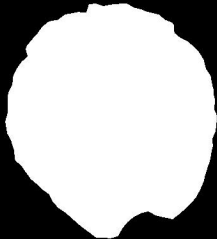



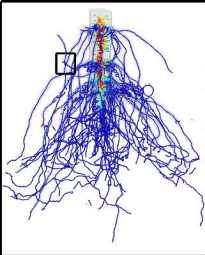

(A)

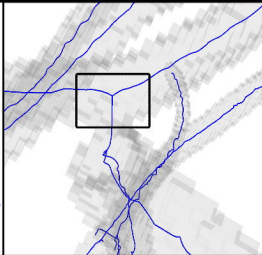

(B)

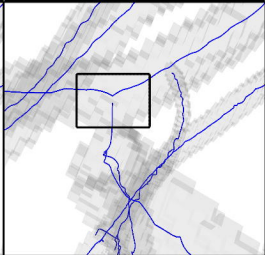

(C)

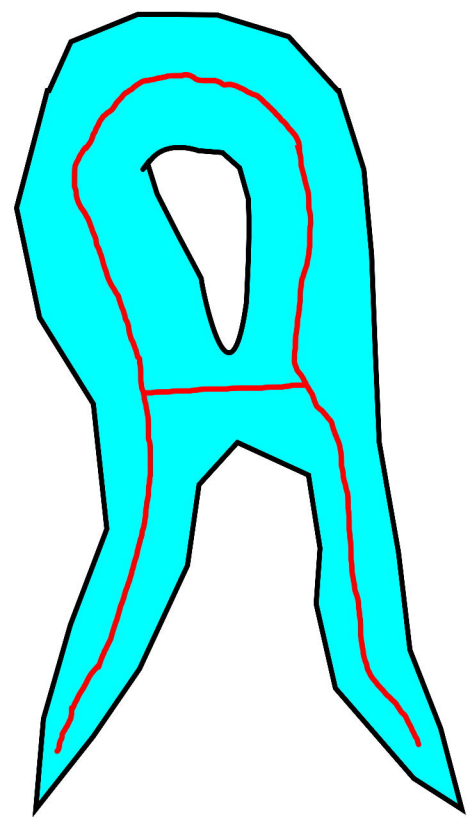

(A)

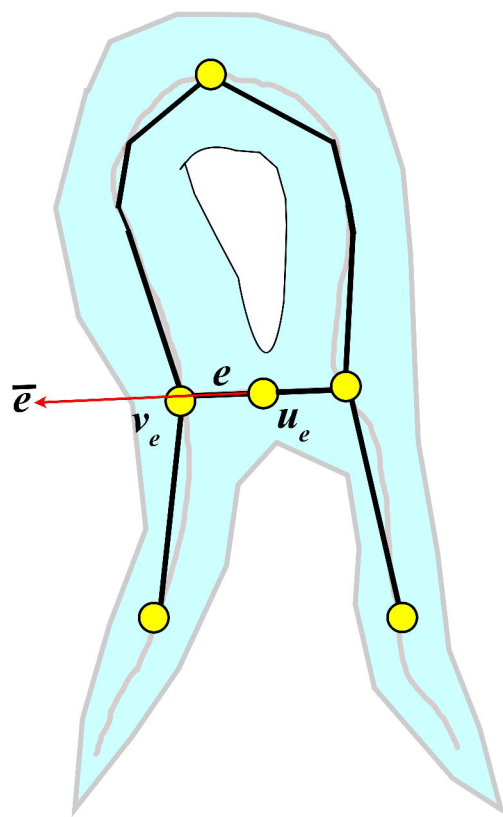

(B)

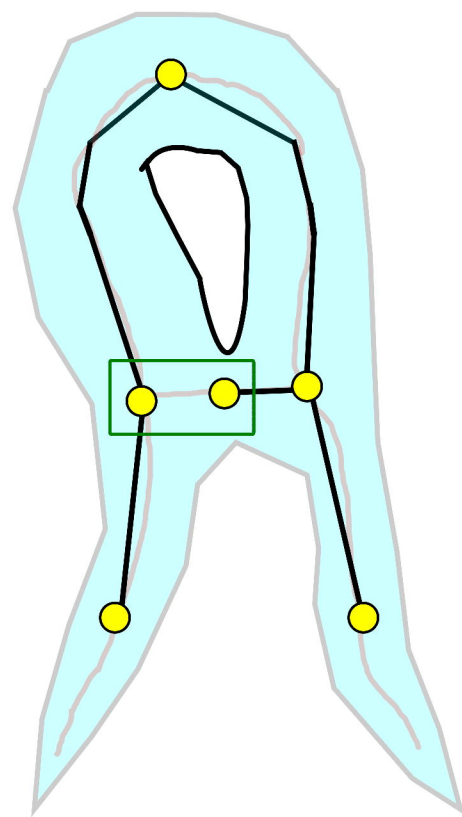

(C)

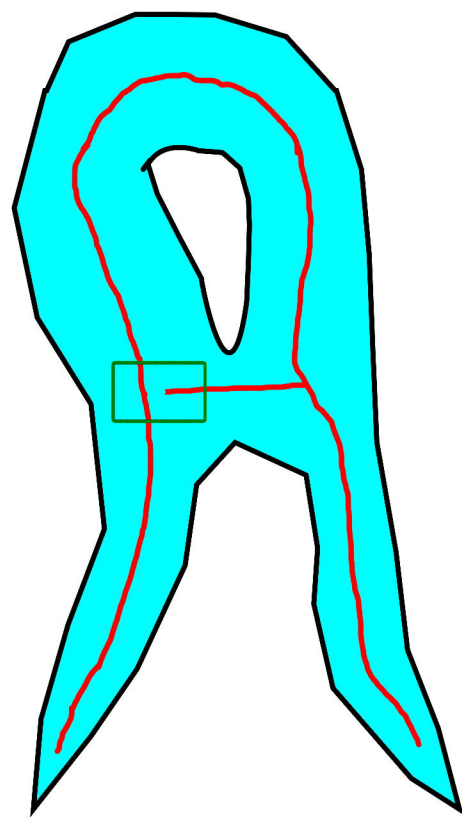

(D)

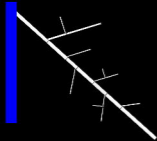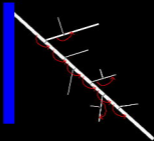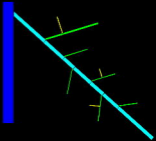

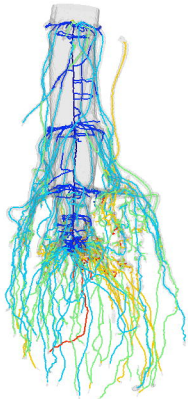

TopoRoot

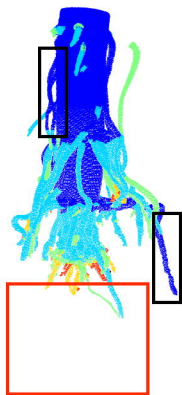

DynamicRoots

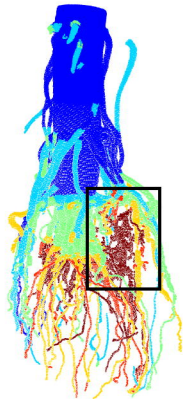

DynamicRoots+

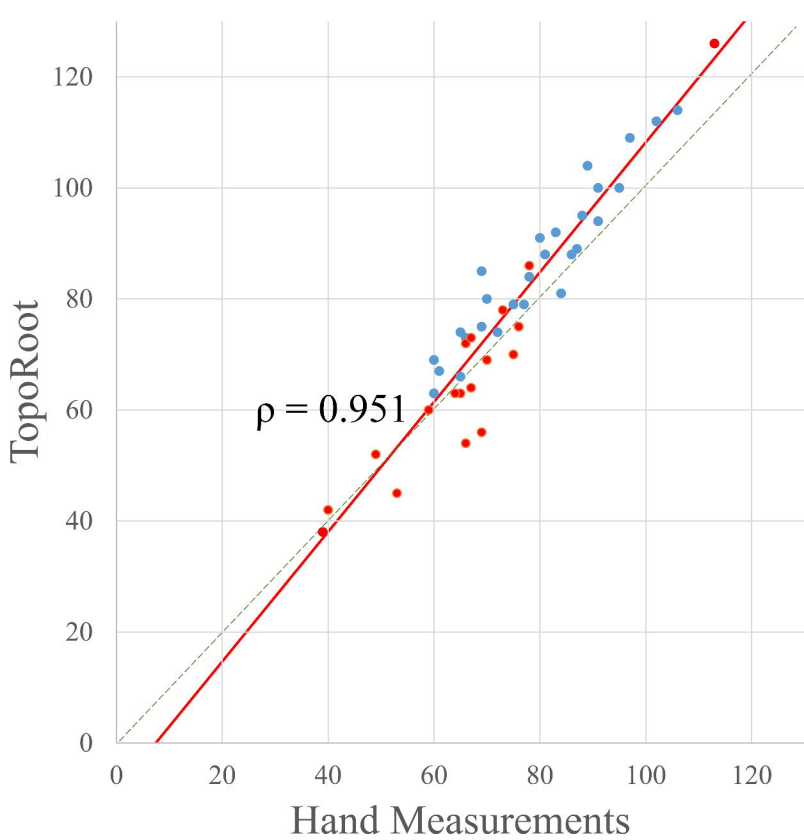

(A)

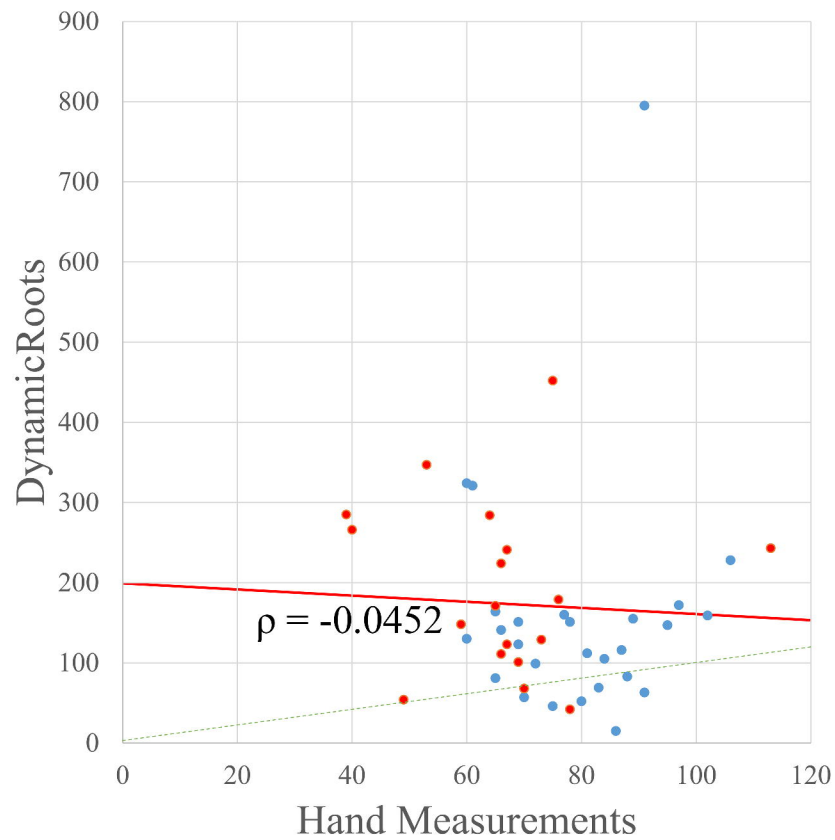

(B)

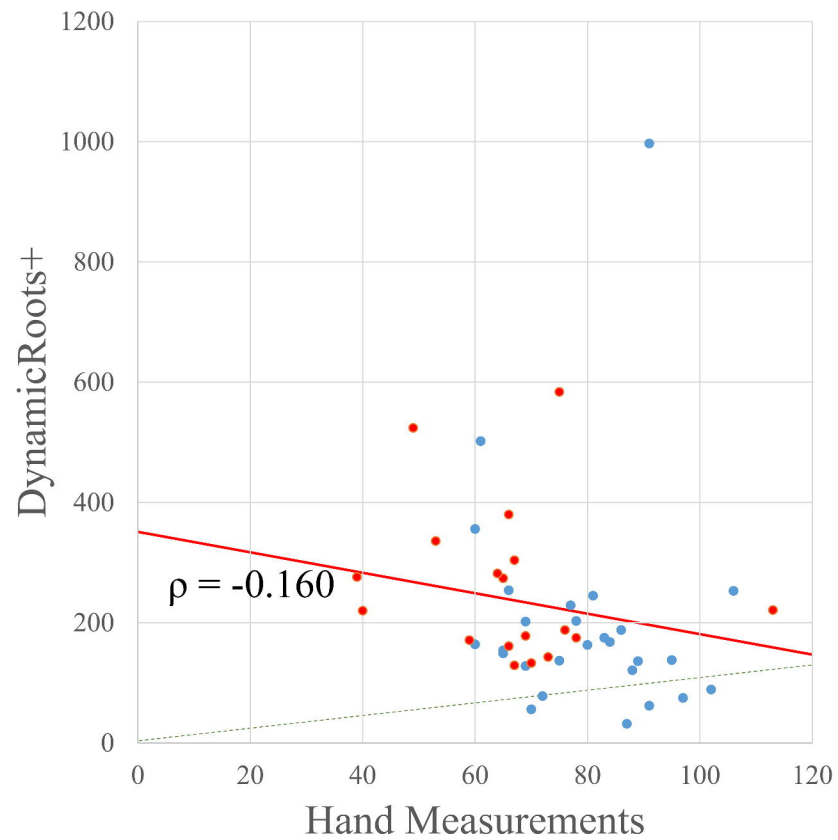

(C)

● Wild-type ● Mutant

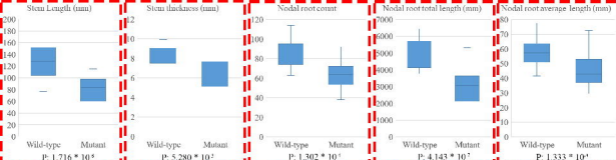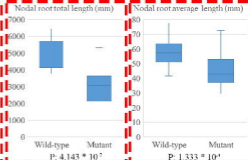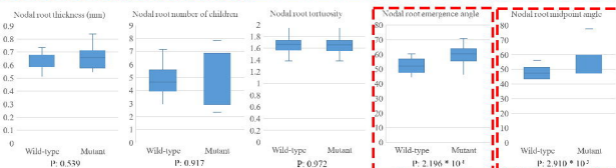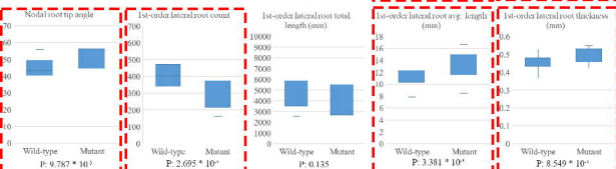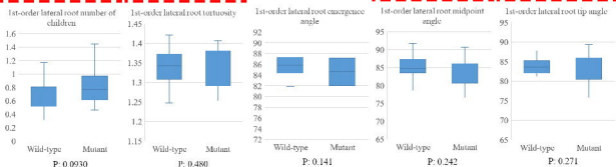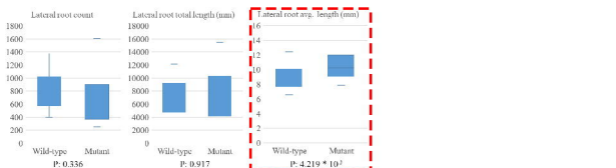

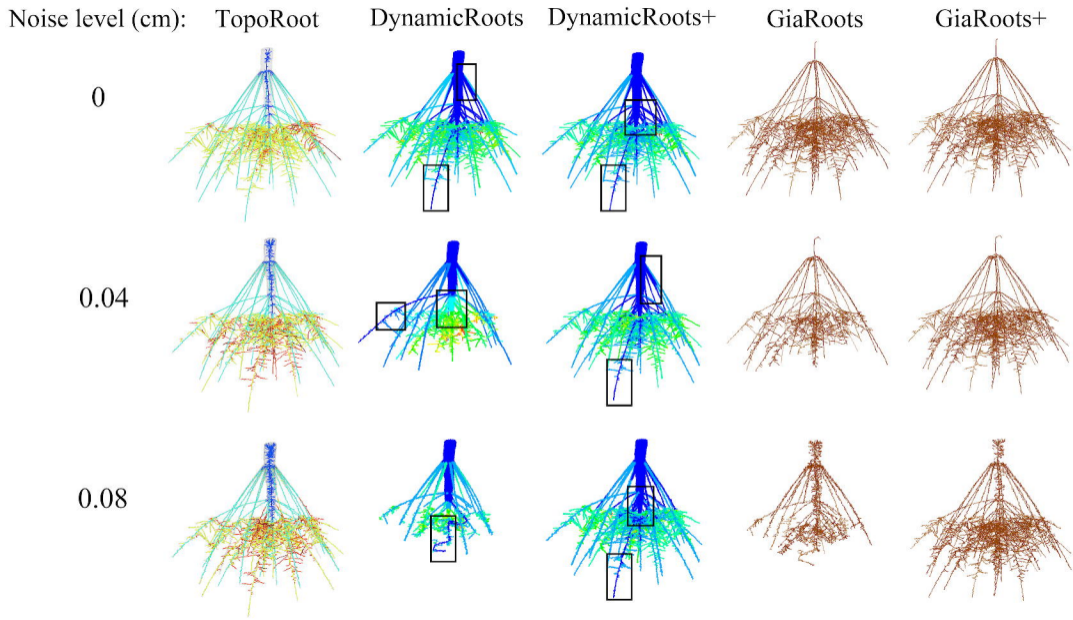



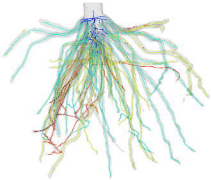

(A)

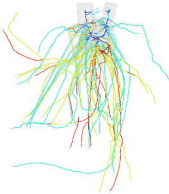

(B)

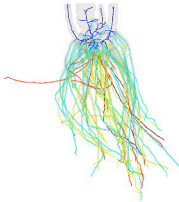

(C)
